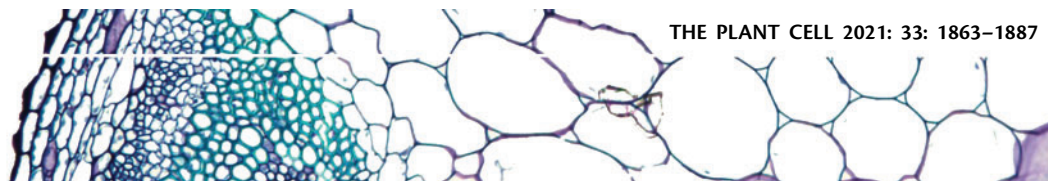

# Gene expression evolution in pattern-triggered immunity within *Arabidopsis thaliana* and across Brassicaceae species

Thomas M. Winkelmüller <sup>1,3,#</sup> Frederickson Entila <sup>1,3,#</sup> Shajahan Anver <sup>1,3,#,†</sup> Anna Piasecka <sup>1,4</sup> Baoxing Song <sup>1,5,||</sup> Eik Dahms <sup>1,3</sup> Hitoshi Sakakibara <sup>1,6,11</sup> Xiangchao Gan <sup>1,5</sup> Karolina Kuřak <sup>1,4,§</sup> Aneta Sawikowska <sup>1,7,8</sup> Paweł Krajewski <sup>1,9</sup> Miltos Tsiantis <sup>1,5</sup> Ruben Garrido-Oter <sup>1,3</sup> Kenji Fukushima <sup>1,10</sup> Paul Schulze-Lefert <sup>1,3</sup> Stefan Laurent <sup>1,5</sup> Paweł Bednarek <sup>1,4</sup> and Kenichi Tsuda <sup>1,2,3,\*,†</sup>

- 1 State Key Laboratory of Agricultural Microbiology, College of Plant Science and Technology, Interdisciplinary Science Research Institute, Huazhong Agricultural University, 430070 Wuhan, China
- 2 The Provincial Key Lab of Plant Pathology of Hubei Province, Huazhong Agricultural University, 430070 Wuhan, China
- 3 Department of Plant–Microbe Interactions, Max Planck Institute for Plant Breeding Research, 50829 Cologne, Germany
- 4 Institute of Bioorganic Chemistry, Polish Academy of Sciences, 61-704 Poznań, Poland
- 5 Department of Comparative Development and Genetics, Max Planck Institute for Plant Breeding Research, 50829 Cologne, Germany
- 6 RIKEN Center for Sustainable Resource Science, 230-0045 Yokohama, Japan
- 7 Department of Mathematical and Statistical Methods, Poznań University of Life Sciences, 60-628 Poznań, Poland
- 8 Institute of Bioorganic Chemistry, Polish Academy of Sciences, 61-704 Poznań, Poland
- 9 Institute of Plant Genetics, Polish Academy of Sciences, 60-479 Poznań, Poland
- 10 Institute for Molecular Plant Physiology and Biophysics, University of Würzburg, 97082 Würzburg, Germany
- 11 Graduate School of Bioagricultural Sciences, Nagoya University, Nagoya 464-8601, Japan

\*Author for correspondence: tsuda@mail.hzau.edu.cn

†Senior author.

‡Present address: Department of Genetics, Evolution and Environment, University College London, London, UK

§Present address: Department of Computational Biology, Adam Mickiewicz University, 61-614 Poznań, Poland

||Present address: Institute for Genomic Diversity, Cornell University, Ithaca, New York

#These authors contributed equally.

T.M.W., S.A., P.S.L., P.B., and K.T. designed the research. T.M.W., F.E., S.A., A.P., and K.K. performed the research. H.S., X.G., M.T., and R.G.-O. contributed new reagent/analytic tools. T.M.W., S.A., F.E., A.P., B.S., E.D., A.S., K.F., S.L., P.B., and K.T. analyzed the data. T.M.W., F.E., and K.T. wrote the paper with input from all authors.

The author responsible for the distribution of materials integral to the findings presented in this article in accordance with the policy described in the Instructions for Authors (<https://academic.oup.com/plcell>) is Kenichi Tsuda (tsuda@mail.hzau.edu.cn).

## Abstract

Plants recognize surrounding microbes by sensing microbe-associated molecular patterns (MAMPs) to activate pattern-triggered immunity (PTI). Despite their significance for microbial control, the evolution of PTI responses remains largely uncharacterized. Here, by employing comparative transcriptomics of six *Arabidopsis thaliana* accessions and three additional Brassicaceae species to investigate PTI responses, we identified a set of genes that commonly respond to the MAMP flg22 and genes that exhibit species-specific expression signatures. Variation in flg22-triggered transcriptome responses across Brassicaceae species was incongruent with their phylogeny, while expression changes were strongly conserved within

## IN A NUTSHELL

**Background:** Plants are surrounded by many microorganisms. To react to these microbes, plants have evolved receptors to sense conserved microbial molecules called microbe associated molecular patterns (MAMPs). For example, many bacteria use flagella for motility, and plants recognize the MAMP flg22 (a 22 amino-acid fragment of flagellin, a principal component of bacterial flagella). Perception of flg22 by the plant cell-surface receptor, which is conserved in most angiosperms, triggers a cascade of immune responses called pattern-triggered immunity (PTI), including transcriptional reprogramming. PTI helps plants properly respond to microbes and is well described in the model plant *Arabidopsis thaliana*. However, the evolution of PTI responses remains poorly explored.

**Question:** How do PTI responses vary within *A. thaliana* accessions and across closely related Brassicaceae species? How did PTI responses such as transcriptional reprogramming evolve within a species and among Brassicaceae?

**Findings:** We profiled the PTI responses of selected *A. thaliana* accessions and three additional closely related Brassicaceae species upon flg22 treatment. Flg22 induced typical PTI responses across Brassicaceae species, although physiological consequences such as the effects of PTI on pathogen resistance and plant growth quantitatively differed. Flg22 treatment induced immediate massive transcriptional reprogramming in the Brassicaceae species, with gene clusters displaying conserved and species-specific patterns. The differences between the transcriptomic responses of *A. thaliana* accessions to flg22 were much smaller than those between Brassicaceae species. These differences did not reflect the phylogenetic relatedness of the Brassicaceae species, suggesting that some species-specific expression patterns were under evolutionary selection. Our results also suggest that the emergence of cis-regulatory elements that are bound by WRKY transcription factors (well known to be involved in immunity) facilitated the evolution of the species-specific gene expression patterns in PTI.

**Next steps:** We will further investigate what drove the evolution of transcriptome responses in PTI and the evolutionary consequences. PTI plays a pivotal role in shaping local microbial communities and defending against invading pathogens. Systematic investigation of the evolution of PTI responses in the context of plant adaptation to microbes and microbial communities will advance our understanding of plant survival in diverse environments and inform agricultural practices.

*A. thaliana*. We found the enrichment of WRKY transcription factor binding sites in the 5'-regulatory regions of conserved and species-specific responsive genes, linking the emergence of WRKY-binding sites with the evolution of gene expression patterns during PTI. Our findings advance our understanding of the evolution of the transcriptome during biotic stress.

## Introduction

The evolution of biological traits is determined both by variation in coding sequence and gene expression (Necsulea and Kaessmann, 2014; Das Gupta and Tsiantis, 2018). However, our understanding of gene expression variation remains fragmented. The conservation of gene expression patterns over millions of years across species points to the general importance of such expression patterns and indicates an evolutionary constraint (Cardoso-Moreira et al., 2019). Conversely, diversified gene expression patterns across different species may reflect neutral or adaptive evolution (Harrison et al., 2012). The immanent noise in expression data makes it difficult to disentangle environmental and genetic effects on gene expression variation; therefore, detecting gene expression variation caused by genetic effects requires comparisons to be performed under the same experimental conditions (Voelckel et al., 2017).

In previous comparative transcriptome studies in plants, it was noted that variation in gene expression between or

within species was substantially enriched for stress-responsive genes, which suggests that changes in stress-responsive gene expression may play an important role in adaptation to the environment (Koenig et al., 2013; Voelckel et al., 2017; Groen et al., 2020). Despite this notion, little is known about how stress-induced transcriptomic changes evolved in plants. To date, few studies comparing expression variation within and across species in unified experimental setups have been performed, especially for plants.

In recent years, several close and distant relatives of the model plant *Arabidopsis thaliana*, belonging to the Brassicaceae family, have been subjected to genome sequencing and used as model systems to study the evolution of various biological traits. For instance, a comparison of the hairy bittercress (*Cardamine hirsuta*) genome with that of *A. thaliana* increased our understanding of the molecular mechanisms that mediate the evolution of leaf shapes and pod shattering (Vlad et al., 2014; Gan et al., 2016; Das Gupta and Tsiantis, 2018). The genome sequences of other

Brassicaceae species including pink shepherd's-purse (*Capsella rubella*) and saltwater cress (*Eutrema salsugineum*) have been used to analyze the mechanisms underlying selfing and abiotic stress-tolerance, respectively (Wu et al., 2012; Slotte et al., 2013; Yang et al., 2013). The availability of rich genomic resources, the broad phylogenetic representations, and the feasibility of growing these Brassicaceae species under the same experimental conditions make them excellent systems for comparative genomics, transcriptomics, and metabolomics analyses.

In nature, plants are surrounded by microbes that could potentially be beneficial or pathogenic (Fitzpatrick et al., 2020). To properly respond to the presence of these microbes, plants have evolved cell-surface localized pattern recognition receptors (PRRs) that sense conserved microbe-associated molecular patterns (MAMPs), leading to the activation of pattern-triggered immunity (PTI) (Albert et al., 2020; Zhou and Zhang, 2020). The two best-characterized MAMPs are the bacteria-derived oligopeptides flg22 and elf18, which are sensed by their corresponding leucine-rich repeat PRRs FLAGELLIN SENSING 2 (FLS2) and EF-TU RECEPTOR (EFR), respectively, in *A. thaliana*. Treating plants with flg22 or elf18 elicits a set of temporally coordinated responses including rapid MAP kinase (MAPK) phosphorylation, genome-wide transcriptional reprogramming, and phytohormone and secondary metabolite production, followed by inhibition of plant growth and increased resistance against pathogens (Albert et al., 2020). Although PTI has been extensively scrutinized in the context of plant–pathogen interactions, it was also recently implicated in the assembly of the plant microbiota, a set of microbes with taxonomically defined structure and composition that colonize the healthy plant (Hacquard et al., 2017; Chen et al., 2020). Thus, PTI serves as the key mechanism that allows plants to adapt to different environments characterized by different microbial communities.

Despite the significance of PTI for plant adaptation to the environment, our understanding of PTI evolution is limited to the evolution of PRRs. For instance, genomes of many plant lineages including members of Brassicaceae, Solanaceae, and Poaceae contain *FLS2*, whereas *EFR* appears to be restricted to Brassicaceae (Boutrot and Zipfel, 2017). However, the conservation of PTI responses among different species and how PTI responses evolve remains poorly understood. Here, we took a comparative transcriptomic and metabolomic approach using *A. thaliana* (six accessions), *C. rubella*, *C. hirsuta*, and *E. salsugineum* in a unified experimental setup with multiple time points to address the evolution of flg22-triggered responses in plants.

## Results

### The tested Brassicaceae plants respond to the MAMP flg22

Based on our analysis using TIMETREE (see the “Methods” section), the Brassicaceae species *C. rubella*, *C. hirsuta*, and *E. salsugineum* diverged from *A. thaliana* ~9, 17, and 26 million years ago (Mya), respectively (Figure 1, A). We first

investigated whether flg22 treatment induces rapid phosphorylation of MPK3 and MPK6, a typical early event in PTI, in these four Brassicaceae plants. Although a previous report indicates that protein extracts from *C. hirsuta*, including those from the Oxford accession (Gan et al., 2016), do not bind to flg22 (implying that *C. hirsuta* does not sense flg22) (Vetter et al., 2012), we observed a clear phosphorylation of the MAPKs MPK3 and MPK6 upon flg22 treatment in all tested Brassicaceae plants, including the Oxford accession of *C. hirsuta*, which was absent in the *A. thaliana* *fls2* mutant (Figure 1, B). We also observed induction of the transcription factor (TF) gene *WRKY29*, a widely used immune marker in *A. thaliana* (Asai et al., 2002), in all tested species at 1, 9, and 24 h after flg22 application (Figure 1, C). Thus, all four tested Brassicaceae species sense flg22 to trigger typical early PTI responses, as observed in *A. thaliana*.

PTI activation reduces plant growth, a late PTI response detectable days after MAMP perception, which is another common measure of PTI outputs in *A. thaliana* (Gómez-Gómez et al., 1999). With the exception of the *fls2* mutant, chronic flg22 exposure reduced seedling growth in all tested species, but the extent of flg22-triggered growth reduction varied and was significantly weaker in *E. salsugineum* compared with the other three species (Figure 1, D).

Another PTI output is enhanced pathogen resistance induced by pre-treating plants with a MAMP. For example, flg22 pre-treatment reduces proliferation of the foliar bacterial pathogen *Pseudomonas syringae* pv. *tomato* DC3000 (*Pto* DC3000) in *A. thaliana* leaves (Zipfel et al., 2004; Tsuda et al., 2008). We found that flg22 pre-treatment reduced bacterial proliferation in *A. thaliana* and *C. rubella* (Figure 1, E). In contrast, *Pto* DC3000 growth was only slightly reduced in *C. hirsuta* and was not altered in *E. salsugineum* by flg22 treatment (Figure 1, E). Thus, the robust induction of early PTI responses by flg22 observed in all tested Brassicaceae does not necessarily lead to heightened immunity against this bacterial pathogen (Figure 1, B and C). We noticed that the *Pto* DC3000 titer was much lower in *E. salsugineum* compared with the other species (Figure 1, E) and speculated that type III effector(s) from *Pto* DC3000 may be recognized in *E. salsugineum*, triggering ETI and masking the flg22-triggered PTI effect. However, flg22 pre-treatment followed by inoculation with a *Pto* DC3000 mutant strain lacking the functional type III secretion system (*Pto hrcC*) led to reduced bacterial growth in *A. thaliana* but not in *E. salsugineum* (Supplemental Figure S1). Thus, flg22 pre-treatment was ineffective against this bacterial pathogen in *E. salsugineum*. In summary, while flg22 triggers typical PTI responses in all tested Brassicaceae plants, the physiological consequences, such as plant growth inhibition and bacterial resistance, vary across species.

### Flg22 triggers extensive transcriptional reprogramming in all tested Brassicaceae species

To study the evolution of transcriptomic changes during PTI responses, we generated RNA-sequencing (RNA-seq) data

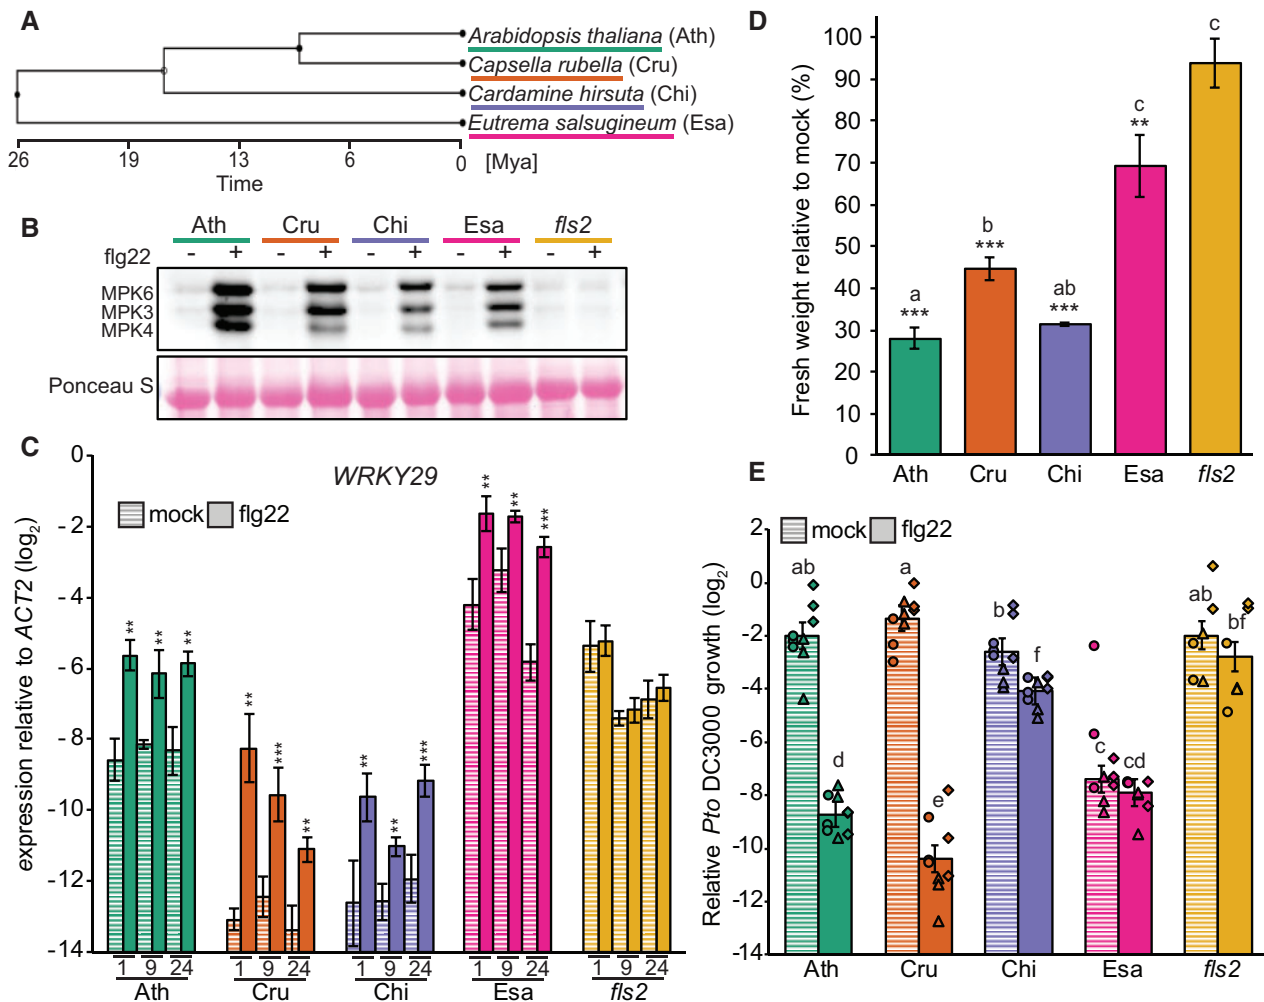

**Figure 1** All tested Brassicaceae species sense flg22. **A**, Phylogenetic tree generated with TimeTree ([www.timetree.org](http://www.timetree.org)) indicating the evolutionary distances between the four Brassicaceae species used in this study. Ath, *A. thaliana* (Col-0); Cru, *C. rubella* (N22697); Chi, *C. hirsuta* (Oxford); Esa, *E. salsugineum* (Shandong). **B**, 12-day-old seedlings were treated with mock or 1  $\mu$ M flg22 for 15 min, and MAPK phosphorylation was measured by immunoblotting using an antiP42/44 antibody. Ponceau staining is shown as a loading control. Experiments were repeated at least three times with similar results. **C**, Expression of *WRKY29* was determined by RT-qPCR at 1, 9, and 24 h after mock or 1  $\mu$ M flg22 treatment of 12-day-old seedlings. Bars represent means and SEs of  $\log_2$  expression levels relative to *ACTIN2* calculated from three independent experiments. Asterisks indicate significant difference from mock (mixed linear model followed by Student's *t* test, \*\* $P < 0.01$ ; \*\*\* $P < 0.001$ ). **D**, Seven-day-old seedlings were transferred into liquid medium containing mock or 1  $\mu$ M flg22 for 12 days. The fresh weight of 12 pooled seedlings was measured. The bars represent means and SEs from three independent experiments. Relative fresh weight (%) of flg22-treated seedlings compared to mock seedlings is shown. Statistical analysis was performed with  $\log_2$ -transformed raw fresh weight values. Asterisks indicate significant flg22 effects in each genotype (mixed linear model followed by Student's *t* test, \*\* $P < 0.01$ ; \*\*\* $P < 0.001$ ). Different letters indicate significant differences in flg22 effects between different genotypes (mixed linear model, adjusted  $P < 0.01$ ). **E**, Five-week-old plants were syringe-infiltrated with 1  $\mu$ M flg22 or mock 24 h prior to infiltration with *Pto* DC3000 ( $OD_{600} = 0.0002$ ). The bacterial titer was determined 48 h after bacterial infiltration. The  $\log_2$  ratio of copy numbers of a bacterial gene (*oprF*) and a plant gene (*ACTIN2*) was determined by qPCR and used to represent relative *Pto* DC3000 growth. Bars represent means and SEs from three independent experiments, each with three biological replicates from different inoculated plants ( $n = 9$ ). The biological replicates from three independent experiments are represented by dots, triangles, and squares. Different letters indicate statistically significant differences (mixed linear model, adjusted  $P < 0.01$ ).

for early (1 h), intermediate (9 h), and late (24 h) transcriptome responses after flg22 or mock treatment of the four Brassicaceae species (Figure 2, A). In total, this dataset comprised 72 samples with 33.3 million 100-bp strand-specific reads per sample on average. The RNA-seq reads were mapped to their corresponding genomes, and normalized

and  $\log_2$ -transformed count data were used for statistical analysis using a linear model (see the "Methods" section).

We identified differentially expressed genes (DEGs) upon flg22 treatment compared with the mock samples based on an adjusted  $P$ -value  $< 0.01$  and a minimum fold-change of two for each species at each time point. We observed

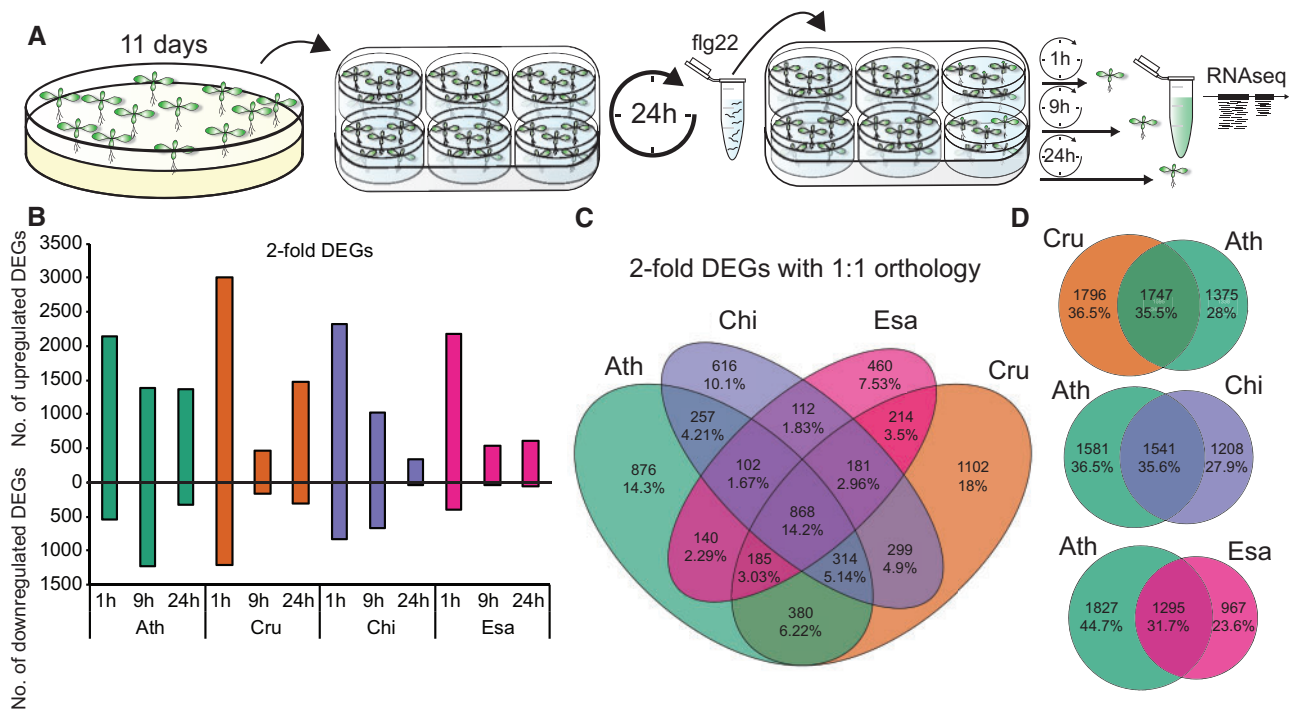

**Figure 2** All tested Brassicaceae species trigger massive transcriptional reprogramming upon flg22 perception. A, Schematic representation of the experimental design. B, The number of DEGs ( $q$ -value  $< 0.01$  and  $|\log_2$  fold change  $> 1$ ) for up- or down-regulated genes was plotted at the indicated time points for each species. C, A Venn diagram showing the number of shared and specific DEGs between species. All DEGs that were differentially expressed at least at one time point in one species that showed 1:1 orthology were used. D, Venn diagrams showing the number of shared DEGs between *A. thaliana* and the indicated species. Ath, *A. thaliana* (Col-0); Cru, *C. rubella* (N22697); Chi, *C. hirsuta* (Oxford); Esa, *E. salsugineum* (Shandong).

massive transcriptional reprogramming in all species, with 4,349, 4,964, 4,038, and 2,861 DEGs in *A. thaliana* (Ath), *C. rubella* (Cru), *C. hirsuta* (Chi), and *E. salsugineum* (Esa), respectively (Figure 2, B). The number of upregulated genes at 1 h was comparable among species, while the number of downregulated genes at 1 h was more variable, with approximately three times as many downregulated genes in *C. rubella* as in *E. salsugineum*. Interestingly, the number of DEGs at later time-points differed markedly among these species: the expression of ~2,000 genes was altered in *A. thaliana* and *C. rubella*, whereas only 300–500 genes were differentially regulated in *C. hirsuta* and *E. salsugineum* at 24 h after flg22 treatment (Figure 2, B).

To compare the expression changes of individual genes among species, we used Best Reciprocal BLAST to detect 1:1 orthologs between *A. thaliana* and the other Brassicaceae species. Subsequently, we only selected genes showing a 1:1 orthologous relationship between *A. thaliana* and each of the Brassicaceae species, resulting in a set of 17,856 orthologous genes (Supplemental Data Set S1). Of the 6,106 genes that were differentially expressed during at least one time point in at least one of the species, 868 DEGs (14.2%) were shared among all Brassicaceae species (Figure 2, C and Supplemental Figure S2, A–C). These 868 DEGs represent a core set of flg22-responsive genes in these Brassicaceae species, as their responses to flg22 were maintained over 26

million years of evolution. We also found that a substantial number of DEGs were species-specific (Figure 2, C). The specific up- or down-regulation of 460–1,102 DEGs suggests substantial diversification of flg22-triggered transcriptional responses during Brassicaceae evolution. Comparisons between *A. thaliana* and each of the species revealed that approximately one-third of flg22-induced transcriptional changes (35.5% with *C. rubella*, 35.6% with *C. hirsuta*, and 31.7% with *E. salsugineum*) were shared between *A. thaliana* and each of the respective species (Figure 2, D). Taken together, flg22 triggers overlapping but distinct, massive transcriptional reprogramming in these Brassicaceae species.

The interpretation of comparative transcriptomics data in its current form is limited to orthologous genes. However, a portion of the transcriptomes that do not show 1:1 orthology may include genes that had uniquely emerged in certain species due to gene duplication events and functional innovations that could potentially contribute to or even drive modifications in the transcriptome landscape. To address this notion, we compared the fraction of DEGs and the magnitude of expression changes between 1:1 orthologs and non 1:1 orthologs. We found that the fraction of DEGs between the two groups was similar. A slightly higher proportion of genes that were responsive to flg22 treatment at 1 h were 1:1 orthologs, and there were no profound differences among these Brassicaceae species (Supplemental

Figure S2, D). Also, the magnitude of expression changes between 1:1 orthologs and non 1:1 orthologs was similar (Supplemental Figure S2, E). Therefore, we focused on 1:1 orthologs for further analysis, as our major aim was to compare gene expression variation among these Brassicaceae species.

### Conserved flg22-responsive genes during Brassicaceae evolution

Next, we examined the expression dynamics of the 868 shared DEGs (Figure 3, A and Supplemental Data Set S2). These shared DEGs exhibit similar expression patterns among all four species: genes induced in one species were also induced in the other species. Comparisons with publicly available datasets revealed that these shared genes are commonly responsive to MAMPs (flg22 and elf18) and damage-associated molecular patterns (oligogalacturonides [OGs] and Pep2) in *A. thaliana* (Figure 3, A). Many well-known genes involved in different aspects of plant immunity were among the conserved flg22-responsive genes, such as genes involved in MAMP perception (*CERK1*, *BAK1*, *BIK1*, and *SOBIR1*), reactive oxygen species production (*RBOHD*), MAPK cascades (*MKK4* and *MPK3*), salicylic acid (SA) signaling (*CBP60G*, *NPR1*, and *NPR3*), and immune-related TFs (*WRKY13/33/40/62*, *ERF6/104*, and *MYB51/122*) (Figure 3, B). In addition, a large number of genes, i.e. ~50% of the top 25 induced genes, whose high induction by flg22 was conserved among all tested Brassicaceae, were either functionally unannotated or were not previously associated with immunity (Figure 3, B; red boxes). Thus, many genes with potentially important and conserved functions in plant immunity remain to be characterized. Taken together, our data define a core set of genes with conserved flg22 responsiveness over 26 million years of Brassicaceae evolution, suggesting that the regulation of these genes might be broadly relevant for plant–bacterial interactions.

### Differences in flg22-triggered transcriptomic responses among Brassicaceae species

While in general, a similar number of genes were differentially expressed after flg22 treatment in the tested Brassicaceae plants, there were substantial differences in temporal dynamics. For instance, transcriptional reprogramming was more transient in *E. salsugineum* compared with *A. thaliana*, and *C. rubella* showed a peculiar pattern characterized by a decrease in the number of DEGs at 9 h and an increase at 24 h (Supplemental Figure S3, A). Rapid and sustained transcriptional responses were previously associated with effective bacterial resistance (Lu et al., 2009; Tsuda et al., 2013; Mine et al., 2018). Thus, the lack of flg22-triggered growth restriction of *Pto* DC3000 in *E. salsugineum* (Figure 1, E and Supplemental Figure S1) might be explained by the transient nature of the transcriptional response in this species. To gain insights into the biological processes associated with this expression pattern, we extracted genes that were induced at 1 h in both *A. thaliana* and

*E. salsugineum* and were induced at 24 h in *A. thaliana* but not in *E. salsugineum* (Supplemental Figure S3, B). By investigating publicly available gene expression datasets, we found that most of these genes were induced by SA in *A. thaliana* (Supplemental Figure S3, C). Consistent with this analysis, flg22 treatment increased SA levels in *A. thaliana* but not in *E. salsugineum* (Supplemental Figure S3, D). These results suggest that activated SA signaling is responsible for sustained transcriptional reprogramming in *A. thaliana*. However, flg22-induced transcriptome responses were comparable between wild-type *A. thaliana* Col-0 and a mutant in *SID2*, an SA biosynthesis gene responsible for increased SA accumulation in response to flg22 (Supplemental Figure S3, E–H; Hillmer et al., 2017). Thus, SA accumulation alone does not explain the distinct temporal dynamics of transcriptional reprogramming in these Brassicaceae plants.

A considerable number of genes were only differentially expressed in one of the Brassicaceae species (Figure 2, C). To understand the degree of specificity in gene expression patterns in these Brassicaceae plants, we clustered and visualized the expression changes of all 6,106 DEGs (Supplemental Figure S4). This analysis revealed that although most of the DEGs showed similar expression patterns, four gene clusters exhibited species-specific signatures (Figure 3, C, Supplemental Figure S4, and Supplemental Data Set S3). These four clusters contained 1,086 genes, representing ~18% of all DEGs. Although gene ontology (GO) term analysis of the shared DEGs revealed a strong enrichment of defense-associated biological processes including immune/defense response, response to bacterium, and response to ethylene/SA/JA stimulus, there was almost a complete lack of GO term enrichment within the four gene clusters showing species-specific expression signatures (Figure 3, D and Supplemental Data Set S4). Perhaps genes showing species-specific patterns may be involved in a collection of biological processes, or perhaps GO analysis is inherently biased toward functional validation and association in *A. thaliana*.

### Transcriptomic responses to flg22 are highly conserved among genetically and geographically diverse *A. thaliana* accessions

The observed differences in gene expression patterns point to diversification processes that might have occurred along the evolutionary trajectory of Brassicaceae plants. Alternatively, such variation in transcriptome responses can arise within a single species. To address this question, we analyzed the variation in flg22 responses among *A. thaliana* accessions. First, we tested the responsiveness of 24 *A. thaliana* accessions to flg22 using a MAPK phosphorylation assay. Flg22 treatment-induced MAPK phosphorylation in all accessions except Cvi-0, which lacks a functional FLS2 receptor, therefore representing a natural negative control (Dunning et al., 2007; Figure 4, A). To avoid underestimating the diversity in flg22 responses within *A. thaliana*, we selected 12 out of the 24 accessions that belong to distinct

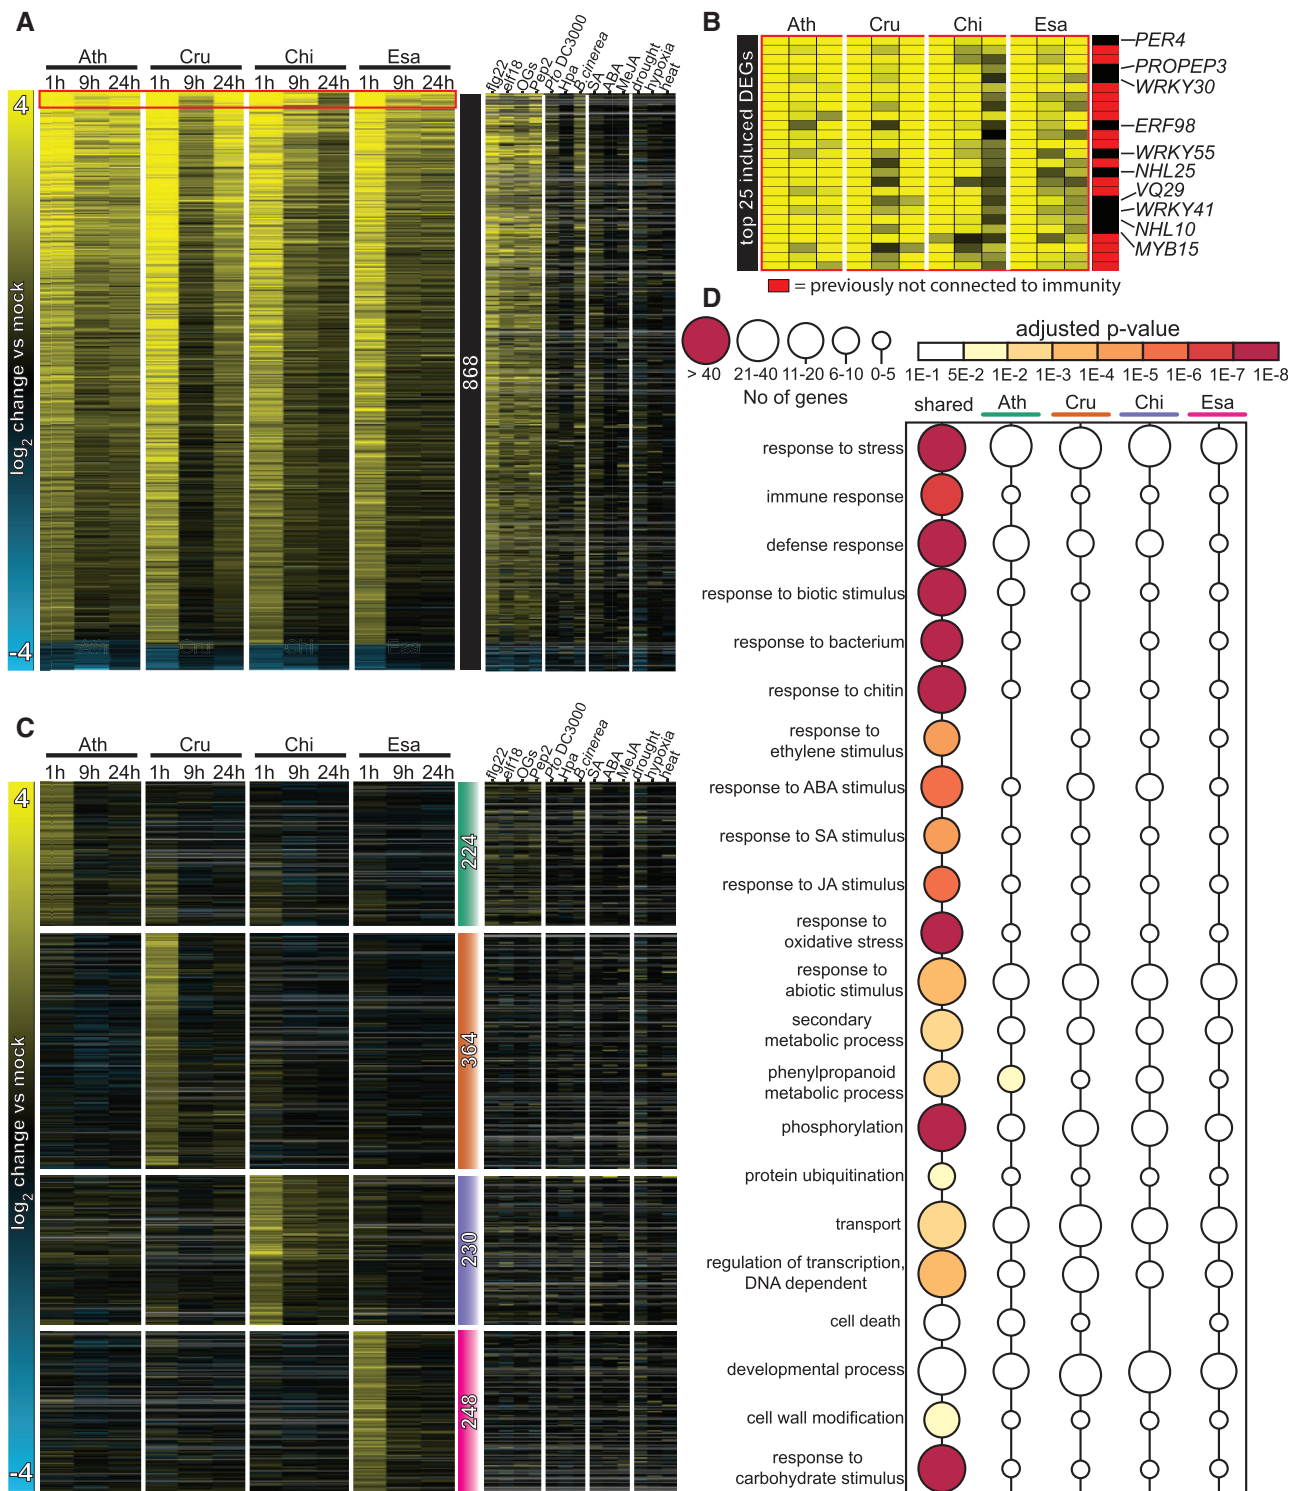

**Figure 3** Conserved yet distinct transcriptomic responses to flg22 in Brassicaceae species. **A**, Heatmap of 868 DEGs shared among the four tested Brassicaceae species (see [Figure 2, C](#)) sorted by mean expression values. The heatmap on the right displays expression changes of the 868 DEGs under the indicated stress conditions in publicly available *A. thaliana* datasets (Genevestigator). Ath, *A. thaliana* (Col-0); Cru, *C. rubella* (N22697); Chi, *C. hirsuta* (Oxford); Esa, *E. salsugineum* (Shandong). See [Supplemental Data Set S2](#) for a list of individual genes. **B**, Heatmap of top 25 flg22-induced genes based on the mean induction of all samples. Red indicates DEGs that previously have not been implicated in plant immunity. **C**, All 6,106 DEGs were clustered by *k*-means (*k* = 15), and four clusters exhibiting species-specific expression signatures are shown (see [Supplemental Data Set S3](#)). Colored bars with the number of genes indicate Ath- (green), Cru- (orange), Chi- (purple), and Esa- (magenta) specific clusters. The heatmap on the right displays expression changes of these genes under the indicated stress conditions in publicly available *A. thaliana* datasets (Genevestigator). See [Supplemental Data Set S3](#) for a list of individual genes. **D**, Enrichment of selected GO terms among common DEGs and species-specific expression clusters (generated with BinGO). Circle sizes indicate the number of genes within each GO term and the color of the circle indicates the adjusted *P*-values for the enrichment of the respective GO terms. See [Supplemental Data Set S4](#) for the full GO terms.

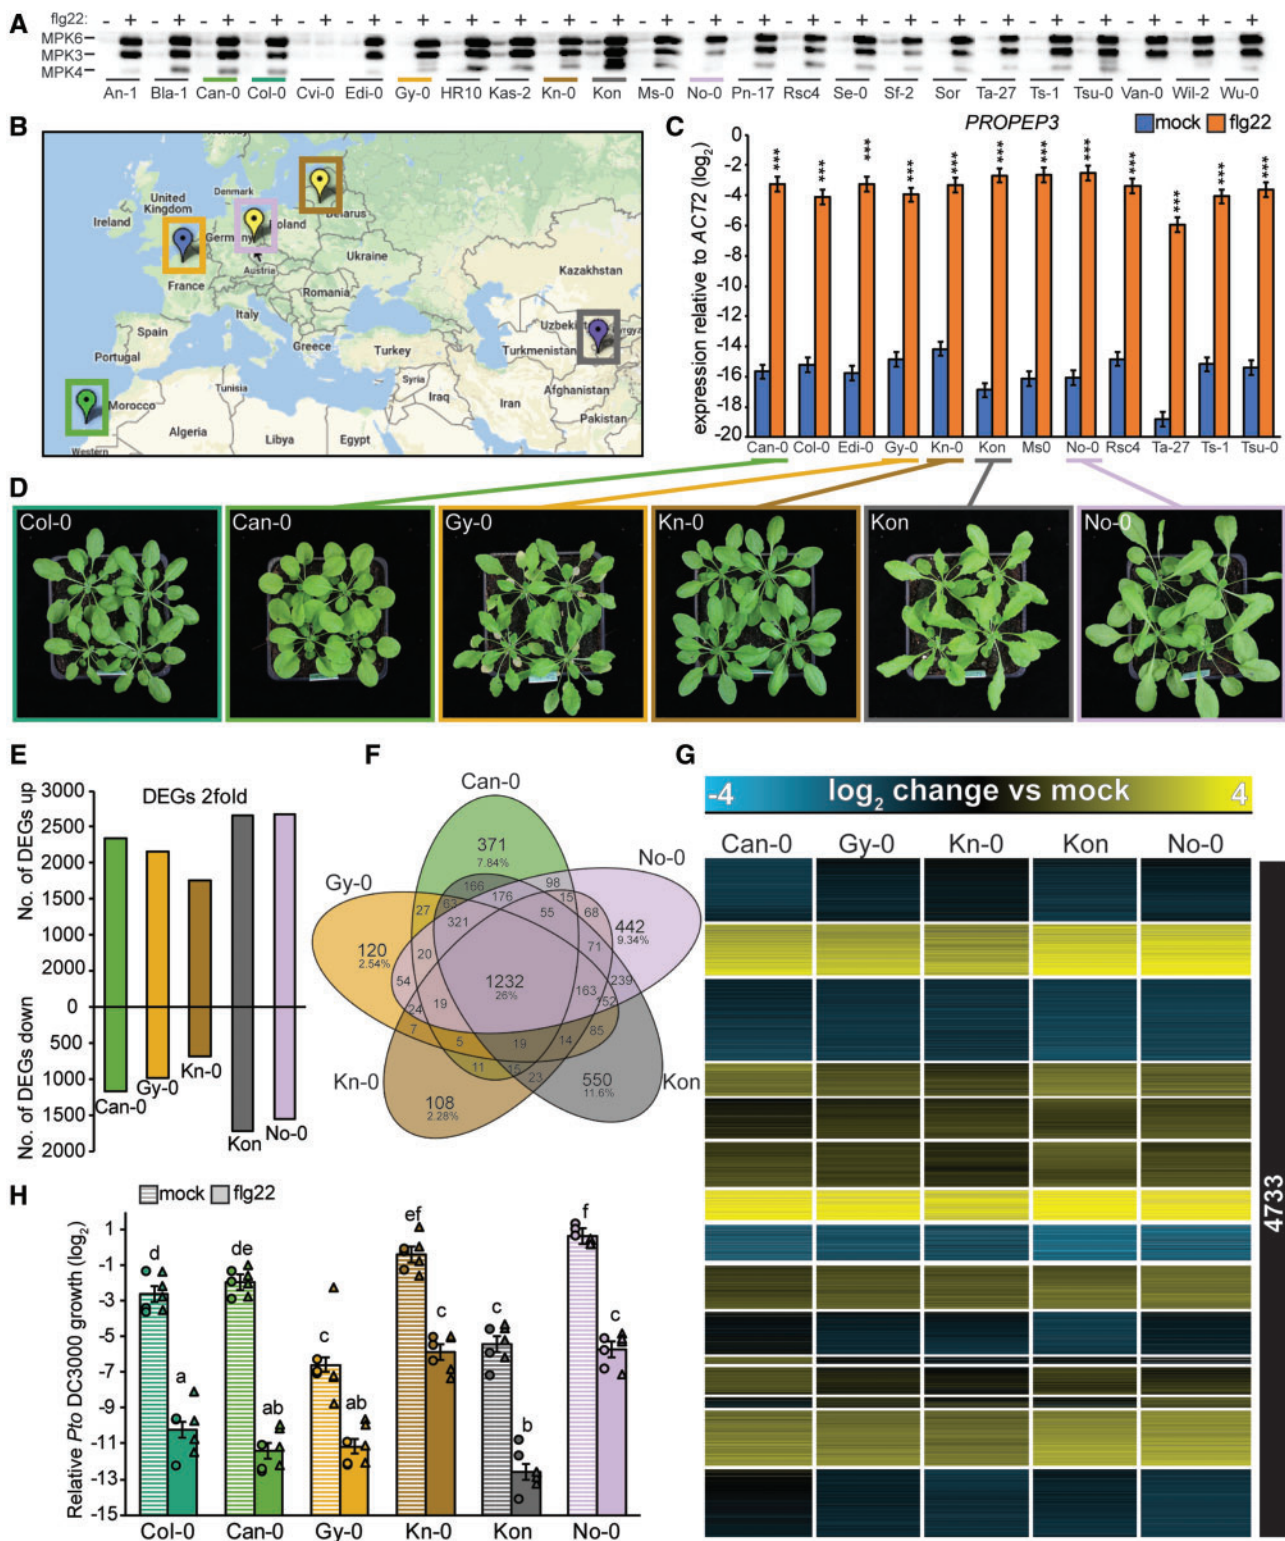

**Figure 4** Flg22-triggered transcriptional responses show a high degree of conservation among *A. thaliana* accessions with diverse genetic backgrounds. **A**, Twelve-day-old seedlings were treated with mock or  $1 \mu\text{M}$  flg22 for 15 min, and MAPK phosphorylation was measured in the indicated *A. thaliana* accessions by immunoblotting using an anti-p42/44 antibody. **B**, Geographic origins of the five accessions chosen for RNA-seq analysis are shown on the map created at 1001genomes.org. The colors of the markers indicate different genetic groups determined by The 1001 Genomes Consortium (1001 Genomes Consortium, 2016). **C**, Twelve-day-old *A. thaliana* seedlings were treated with mock or  $1 \mu\text{M}$  flg22 for 1 h, and expression of *PROPEP3* was determined by RT-qPCR. The accessions highlighted in color were used for the RNA-seq experiments. Bars represent means and SEs of  $\log_2$  expression levels relative to *ACTIN2* from three independent experiments. Asterisks indicate significant differences of flg22 compared with mock samples (Student's *t* test,  $***P < 0.001$ ). **D**, Representative photographs of the 4-week-old *A. thaliana* accessions chosen for RNA-seq. **E–G**, 12-day-old *A. thaliana* seedlings were treated with mock or  $1 \mu\text{M}$  flg22 for 1 h and extracted RNA was subjected to RNA-seq.



genetic groups (based on admixture groups from 1001genomes.org) and are geographically distributed over the United States, Europe, and Asia (Figure 4, B). We found that the expression of the early immune marker gene *PROPEP3* was induced in all 12 accessions at 1 h after flg22 treatment (Figure 4, C). We generated and analyzed the transcriptomes of five of these 12 accessions at 1 h after flg22 or mock treatment using RNA-seq. Importantly, these accessions were collected from geographically distant regions, were genetically diverse, and showed variable growth phenotypes (Figure 4, B and D). We mapped the RNA-seq reads to the *A. thaliana* Col-0 reference genome and used the same set of 17,856 1:1 orthologous genes that we used in the comparison between Brassicaceae species to avoid overestimating conservation attributable to the larger number of shared genes among *A. thaliana* accessions.

The transcriptome responses of the selected *A. thaliana* accessions to 1 h-flg22 treatment were similar in magnitude to those of other Brassicaceae species and the *A. thaliana* Col-0 accession (4,964–2,861 DEGs), ranging from 4,372 (Kon) to 2,443 (Kn-0) DEGs (Figure 4, E). However, the overlap of DEGs among the five *A. thaliana* accessions was greater than that of the four Brassicaceae species, as 1,232 DEGs (26% of the total) were shared among these five accessions, while 764 DEGs (15.7% of the total at 1 h) were shared among the four Brassicaceae species (Figure 4, F and Supplemental Figure S2). Consistent with these findings, the expression patterns of all 4,733 DEGs (differentially expressed in at least one accession) were highly conserved among the five accessions, and we did not find accession-specific expression clusters with the same clustering threshold used in the interspecies comparisons (Figure 4, G and Supplemental Data Set S5). Mapping the RNA-seq reads to the Col-0 reference genome could potentially bias the analysis toward similar expression patterns among *A. thaliana* accessions. To test for this possibility, we generated SNP-corrected genomes for each accession and re-mapped the RNA-seq reads from *A. thaliana* accessions to their own genomes. These two mapping procedures yielded comparable results (Supplemental Figure S5). Therefore, we used the initial mapping procedure to the Col-0 reference genome for the following analyses.

We speculated that the high similarity in flg22-induced transcriptional reprogramming observed in the *A. thaliana* accessions would lead to similar effects on flg22-triggered immunity against *Pto* DC3000. Indeed, flg22 significantly reduced *Pto* DC3000 titers in all accessions, although the

bacterial growth under mock conditions differed among accessions, with lower bacterial titers in Gy-0 and Kon and higher titers in No-0 compared with Col-0 (Figure 4, H). Taken together, these results indicate that the within-species variation of early flg22-induced gene expression changes is smaller than the between-species variation, despite the wide global distribution of *A. thaliana*.

### Inter-species variation in transcriptome responses to flg22 exceeds intra-species variation and is incongruent with the phylogeny

To directly compare variation in transcriptome responses to flg22 across the Brassicaceae species and within *A. thaliana*, we re-analyzed the data from all 1 h samples together. We normalized the data, identified the DEGs, and clustered the  $\log_2$  expression changes of all 5,961 DEGs together. Similar to the previous analyses, the heatmap revealed gene clusters with species-specific signatures for each species but not a single gene cluster with *A. thaliana* accession-specific signatures (Figure 5, A and B and Supplemental Data Set S6). Wrongly assigned orthologous pairs could lead to spurious identification of species-specific expression patterns. Defining true orthologous genes between different species is challenging, especially for gene families with many homologous genes. We reasoned that if the identification of genes with species-specific expression signatures resulted from the incorrect assignment of orthologs, the species-specific gene clusters should be associated with larger gene families compared with other gene clusters. However, we did not observe such a relationship (Supplemental Figure S6, A). Therefore, the incorrect assignment of orthologous gene pairs unlikely explains the majority of the species-specific gene expression patterns. Another possibility is that distinct expression changes for genes showing species-specific patterns might be caused by differences in the basal expression level (in mock) among different Brassicaceae plants. Nevertheless, we did not find any consistent patterns in the basal expression levels of genes that would explain species-specific induction by flg22 (Supplemental Figure S6, B). Thus, inter-species variation in transcriptome responses to flg22 among the selected Brassicaceae species clearly exceeds intra-species variation among *A. thaliana* accessions.

To provide statistical support for this conclusion, we determined the number of genes that responded differently to flg22 among the Brassicaceae plants including *A. thaliana* Col-0 or among the five *A. thaliana* accessions. We detected

#### Figure 4 (Continued)

The analysis was limited to the list of 17,856 genes showing 1:1 orthology in all tested Brassicaceae species to directly compare inter- and intra-species variation in transcriptome responses. DEGs were defined using the following criteria:  $q\text{-value} < 0.01$  and  $|\log_2 \text{fold change}| > 1$ . E, Bars represent the number of up- or down-regulated DEGs in each *A. thaliana* accession. F, A Venn diagram showing the number of shared and specific DEGs in *A. thaliana* accessions. G, Heatmap of DEGs in at least one accession clustered by  $k\text{-means}$  ( $k = 15$ ).  $\log_2$  expression changes compared with mock are shown. See Supplemental Data Set S5 for a list of individual genes. H, Five-week-old plants were syringe-infiltrated with mock or  $1 \mu\text{M}$  flg22 24 h prior to infiltration with *Pto* DC3000 ( $\text{OD}_{600} = 0.0002$ ). The  $\log_2$  ratio of copy numbers of a bacterial gene (*oprF*) and a plant gene (*ACTIN2*) was determined by qPCR and used to represent relative *Pto* DC3000 growth. Bars represent means and SEs from two independent experiments each with three biological replicates ( $n = 6$ ). The biological replicates from two independent experiments are represented by dots and triangles. Different letters indicate significant differences (mixed linear model, adjusted  $P < 0.01$ ).

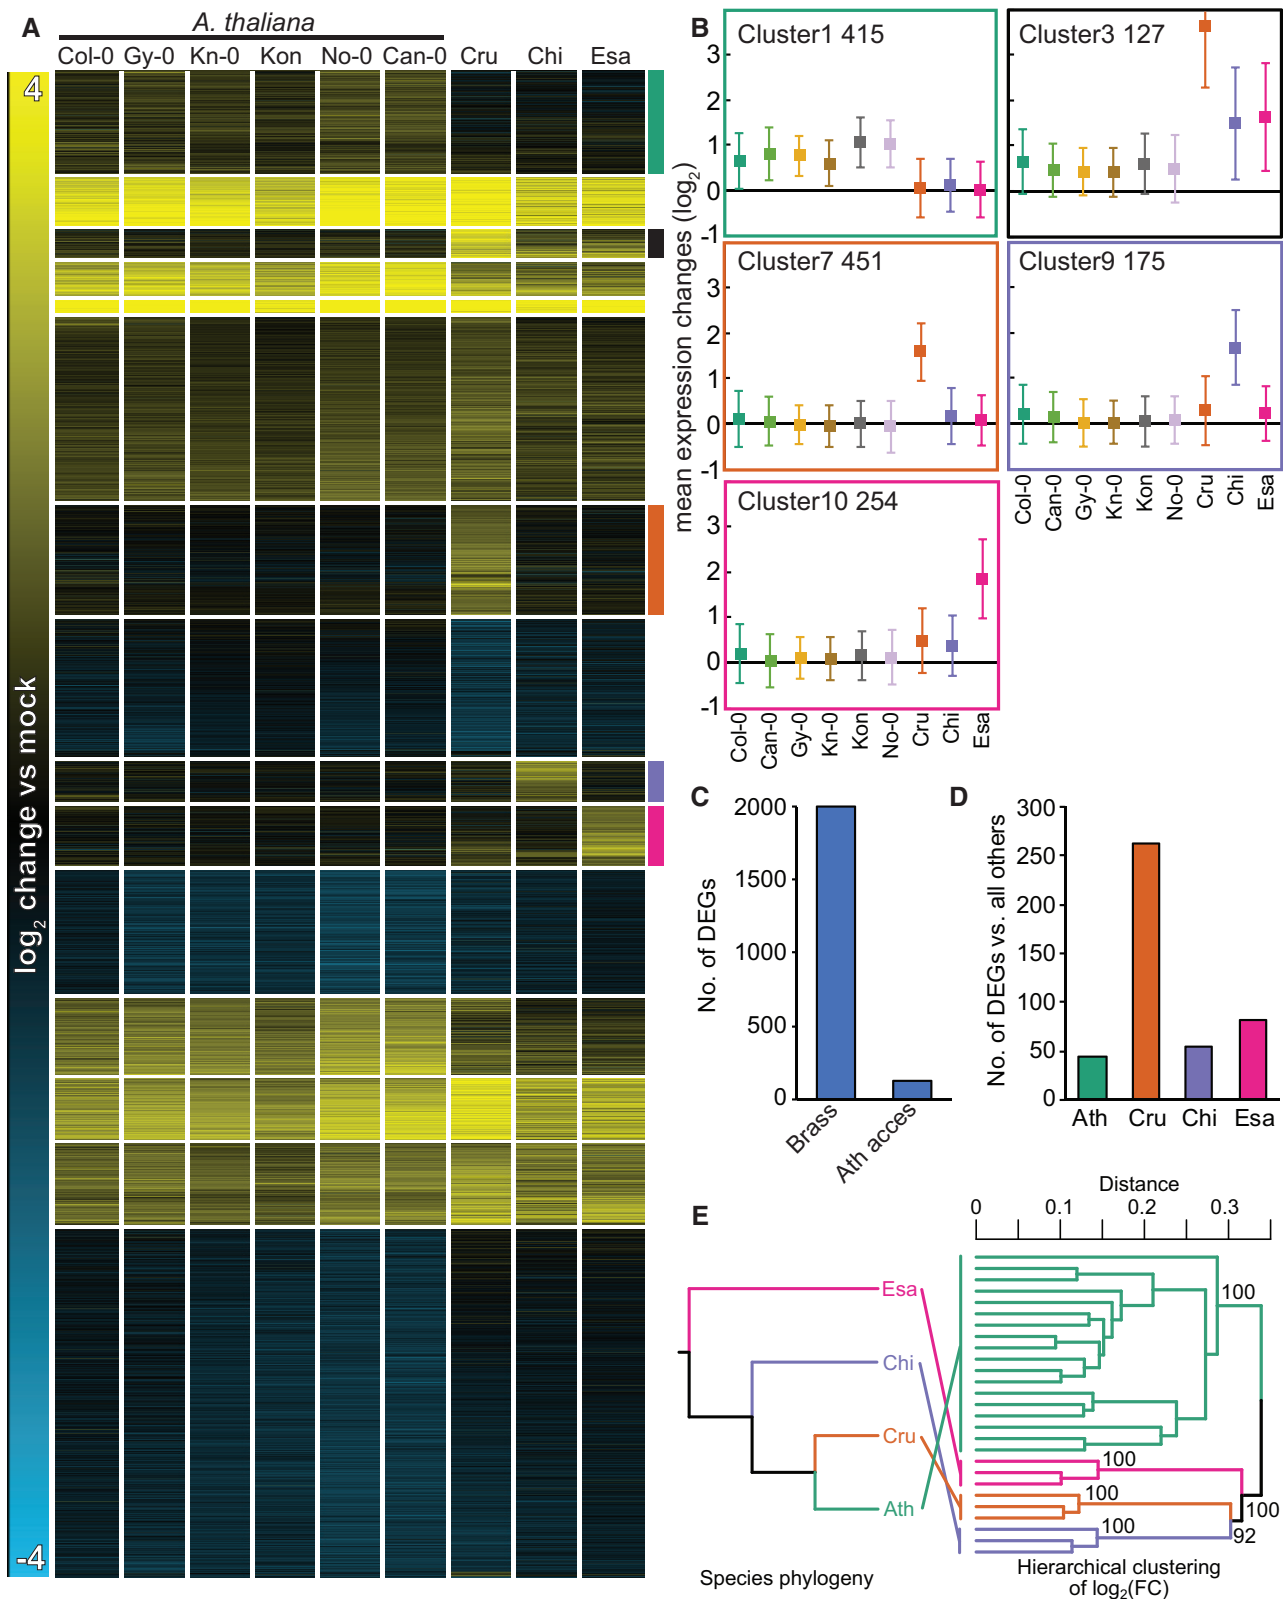

**Figure 5** Inter-species variation exceeds intra-species variation in transcriptome responses to flg22 and is incongruent with the phylogeny. A, Log<sub>2</sub> expression changes of all 5,961 DEGs 1 h after 1 μM flg22 treatment were clustered using *k*-mean clustering (*k* = 15). 1:1 orthologous genes that are differentially expressed (*q*-value < 0.01; |log<sub>2</sub> fold change| > 1) in at least one species or accession were used. Species-specific expression clusters are highlighted by colored bars on the right side of the heatmap (Ath (green), non-Ath (black), Cru (orange) Chi (purple), Esa (magenta)). Cru, *C. rubella* (N22697); Chi, *C. hirsuta* (Oxford); Esa, *E. salsugineum* (Shandong). See [Supplemental Data Set S6](#) for a list of individual genes. B, Mean expression changes ± SD of species-specific expression clusters in (A). The number of genes within each cluster is represented by the

1,992 DEGs in the inter-species comparison and only 131 DEGs in the comparison among *A. thaliana* accessions (Figure 5, C). Of these 131 genes, only the Can-0 accession harbored one gene that responded differently compared with all other accessions. Among Brassicaceae plants, a considerable number of genes were specifically differentially expressed in only one of the species (Figure 5, D).

The observed divergent gene expression patterns between different species together with the low variation within species could have been shaped by neutral evolution or lineage-specific non-neutral evolution, such as stabilizing selection and adaptive evolution. If the transcriptome variation among Brassicaceae species was caused by stochastic processes and was thus selectively neutral, such variation should correlate with the phylogenetic distance between the species (Broadley et al., 2008). To test this possibility, we performed a hierarchical clustering of the  $\log_2$  fold changes of all 1:1 orthologs, including both DEGs and non DEGs, at 1 h after flg22 treatment. Species-specific clades were successfully recovered with high support (bootstrap value = 100), and the relationship among the species-specific clades did not concur with the species phylogeny (Figure 5, E). These results suggest that species-specific transcriptome responses to flg22 reflect non-neutral processes during Brassicaceae evolution.

To further explore this possibility, we performed multi-optimality phylogenetic Ornstein–Uhlenbeck (OU) modeling (Hansen, 1997) for each ortholog using  $\log_2$  fold changes as trait values to be fit. The hierarchical clustering results could be strongly affected by genes with large expression variation between species, potentially providing a distorted view of the evolution of gene expression. However, because multi-optimality phylogenetic OU modeling is a gene-by-gene analysis in which each gene contributes to the overall patterns equally, the results are expected to be robust against biases from a small number of genes with large effects. In these models, the strength of neutral drift and the pull toward the estimated theoretical optimum were taken into account with parameters  $\sigma^2$  and  $\alpha$ , respectively. Potentially adaptive changes were searched as regime shifts of the theoretical optimum by the phylogenetic LASSO algorithm with a phylogeny-aware information criterion (pBIC) (Khabbazian et al., 2016). We note that the necessarily limited number of species that were sampled in this study might inflate false positives. The regime shifts were detected in 3,136 out of 5,961 orthologous genes, suggesting frequent evolutionary changes in flg22-triggered transcriptional responses that could potentially be selectively driven (Supplemental Figure S7). Notably, the four species-specific clusters (Figure 5, A)

showed the highest shift frequencies in the branches connected to the corresponding species compared with the others (Supplemental Figure S7). These results suggest that these clusters are enriched in a group of genes that could have evolved through the non-neutral switching of selective regimes in addition to neutral drift and/or stabilizing selection.

The conservation of gene induction across six *A. thaliana* accessions (Figure 5, A and B; Cluster 1) suggests that the observed species-specific expression signatures in Brassicaceae species might represent novel inventions in the respective species. To test this idea, we measured changes in the expression of selected genes showing species-specific expression signatures in different accessions or sister species of *C. rubella*, *C. hirsuta*, and *E. salsugineum* by RT-qPCR. For this, we selected grand shepherd's-purse (*Capsella grandiflora*; Cgr, a sister species of *C. rubella*), two additional *C. hirsuta* accessions (Wa and GR2), and one additional *E. salsugineum* accession (YT). We selected PR4, CYP79B2, and NAC32 as *C. rubella*-specific genes. PR4 and NAC32 were specifically induced in both *C. rubella* and *C. grandiflora*, while CYP79B2 was induced in these two species as well as *A. thaliana* Col-0 (Figure 6). The two *C. hirsuta*-specific genes RAC7 and AT3G60966 (as there is no common name for AT3G60966, we used the *A. thaliana* gene code) were specifically induced in all three *C. hirsuta* accessions, with the exception of AT3G60966, which was also induced in *C. grandiflora*. All three *E. salsugineum*-specific genes (APK4, *bZip TF*, and CYP77A4) were induced only in *E. salsugineum* accessions (Figure 6). Together, these findings demonstrate that the specific patterns of gene expression observed in each of the tested Brassicaceae are conserved features in the respective species or lineage.

### WRKY TFs are central for flg22-triggered gene induction and may be responsible for the emergence of species-specific gene induction

Changes in gene transcription are often mediated by the binding of specific TFs to 5'-regulatory regions (Baxter et al., 2012). However, our understanding of how gene expression is regulated during PTI, whether gene regulatory mechanisms differ in different species, and how a given species acquires a new mode of gene regulation is far from complete. Together with genomic resources, we reasoned that our datasets, which revealed both conserved and diversified gene expression patterns in the Brassicaceae species, may provide valuable insights into these questions. To this end, we searched the 5'-regulatory regions (500 bp upstream of

#### Figure 5 (Continued)

numbers on the top left side of each plot. C, The total number of genes that respond to flg22 significantly differently across Brassicaceae species including *A. thaliana* Col-0 (Brass) or across *A. thaliana* accessions (Ath access).  $q$ -value  $< 0.01$ ;  $|\log_2$  fold change|  $> 1$  criteria were used. D, The number of genes that respond to flg22 significantly differently in each Brassicaceae species compared with the other three Brassicaceae species.  $q$ -value  $< 0.01$ ;  $|\log_2$  fold change|  $> 1$  criteria were used. Ath, *A. thaliana* (Col-0). E, A hierarchical clustering with  $\log_2$  fold changes of 1:1 orthologs. The topology of the dendrogram (right) is compared to the species tree (left). Pairwise distance matrix (1 – Pearson's correlation coefficient) were analyzed with the R package “pvclust” with default settings. Support values for clades were obtained by 1,000 bootstrapping.

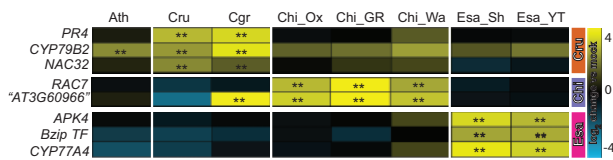

**Figure 6** Species-specific expression signatures are conserved in sister species and accessions. Expression of selected genes showing species-specific expression signatures in Figure 5, A were determined in available sister species and accessions by RT-qPCR. Gene expression was normalized to *ACTIN2*. The colored bars on the right indicate genes showing Cru- (orange), Chi- (purple), or Esa- (magenta) specific expression signatures. The heatmap represents mean  $\log_2$  changes of flg22 samples compared with mock from three independent experiments, each with two biological replicates ( $n = 6$ ). Asterisks indicate significant flg22 effects (mixed linear model,  $P < 0.01$ ). Ath, *A. thaliana* Col-0; Cru, *C. rubella*; Cgr, *C. grandiflora*; Chi\_Ox, Chi\_GR, Chi\_Wa, different *C. hirsuta* accessions; Esa\_Sh, *E. salsugineum* Shandong; Esa\_YT, Esa Yukon.

the transcriptional start site) of the genes in each of the 15 gene clusters (Figure 5) for known TF-binding motifs in each Brassicaceae species. Our analysis revealed that multiple motifs, which are typically bound by WRKY TFs, are highly enriched in the 5'-regulatory regions of genes in common flg22-induced clusters such as Clusters 2, 5, 13, and 14 (Figure 7, A and Supplemental Figure S8). In *A. thaliana*, WRKY TFs are known to regulate transcriptional reprogramming during plant immunity, including responses to flg22 (Tsuda and Somssich, 2015; Birkenbihl et al., 2017). Also, the WRKY gene family has significantly expanded in land plants, which was likely required for adaptation to the terrestrial environment (One Thousand Plant Transcriptomes Initiative, 2019). Our results suggest that transcriptional induction mediated by WRKY TFs is a conserved mechanism in response to flg22 across these Brassicaceae species. In addition, the 5'-gene regulatory regions of flg22-induced expression clusters in *A. thaliana*, *C. rubella*, and *C. hirsuta* (Clusters 13, 6, and 14, respectively) were significantly enriched for CAMTA TF-binding motifs (Supplemental Data Set S7), which play an important role in early immune transcriptional reprogramming (Jacob et al., 2018).

Interestingly, we found that WRKY TFs are associated with the 5'-regulatory regions of genes showing species-specific induction only in the species that are highly flg22-responsive. For instance, in Clusters 1, 3, and 10, WRKY TF-binding motifs were only enriched in 5'-regulatory regions of flg22-induced genes in *A. thaliana*, *C. rubella*, and *E. salsugineum*, respectively (Figure 7, B). In addition, in the *C. rubella*-specific expression cluster (Cluster 7), AHL TF-motifs were enriched only in *C. rubella* 5'-regulatory regions (Figure 7, B). AHL TFs have been associated with plant developmental processes, but some AHL TFs are involved in MAMP-induced gene expression (Lou et al., 2014; Mine et al., 2018). These results suggest that in these Brassicaceae plants, the emergence of cis-regulatory sequences that are bound by specific TFs (such as WRKY TFs) facilitated the evolution of distinct gene induction patterns.

## Variation in coding sequences shows no strong correlation with transcriptome variation

Previous studies reported a positive correlation between gene expression and coding sequence evolution and suggested that similar selective forces might have acted on both modes of evolution (Khaltovich et al., 2005; Slotte et al., 2011; Hunt et al., 2013; Hodgins et al., 2016), although it should be noted that in some studies, this correlation was organ-dependent or not detected at all (Tirosh and Barkai, 2008; Whittle et al., 2014). Thus, the relationship between gene expression and coding sequence evolution appears to be species- or condition-dependent. Therefore, we asked whether the variation in basal or flg22-triggered expression changes is correlated with variation in amino acid (AA) sequences among the tested Brassicaceae species. We compared the standard deviation divided by the mean of the expression levels in mock-treated RNA-seq samples (1 h) of *A. thaliana* Col-0 and other Brassicaceae plants with the mean AA sequence identities between *A. thaliana* Col-0 and each of the other species. We found no correlation between the variation in AA sequence and basal gene expression (Figure 8, A). Similarly, we compared flg22-induced expression changes of all expressed genes or DEGs (1 h) with AA sequence identities and found no correlation (Figure 8, B and C). Finally, we tested whether pairwise differences in flg22-induced expression changes between *A. thaliana* and individual Brassicaceae species were linked to AA sequence diversification. Again, we did not find any strong correlation (Figure 8, D–I). We also tested for synonymous or non-synonymous polymorphism (dN/dS) and did not find any strong correlation (Supplemental Figure S9). Thus, variation in gene expression at both the basal level and in response to flg22 does not correlate with variation in AA sequences or dN/dS, suggesting that different selective forces influence gene expression and coding sequence evolution in these Brassicaceae species.

## Purifying selection may have acted on the regulatory regions of conserved flg22-responsive genes across Brassicaceae species

To test whether genes displaying a specific response in *A. thaliana* (Cluster 1) may have been subjected to recent adaptive pressures, we compared their patterns of polymorphism and divergence at upstream and coding regions with other gene clusters displaying no *A. thaliana*-specific expression (Clusters 2, 5, 7, and 9). If recent and recurrent regulatory adaptive mutations in *A. thaliana* were the ultimate cause of the expression specificity observed in Cluster 1, we should observe an elevated divergence between *A. thaliana* and *Arabidopsis lyrata* at regulatory regions compared with the other clusters and potentially a distribution of allele frequencies skewed toward higher frequency classes compared with neutral expectations (Nielsen, 2005). Instead, our results indicate that the genetic variation observed in genes with *A. thaliana*-specific responses is overall in line with the variation observed in other clusters

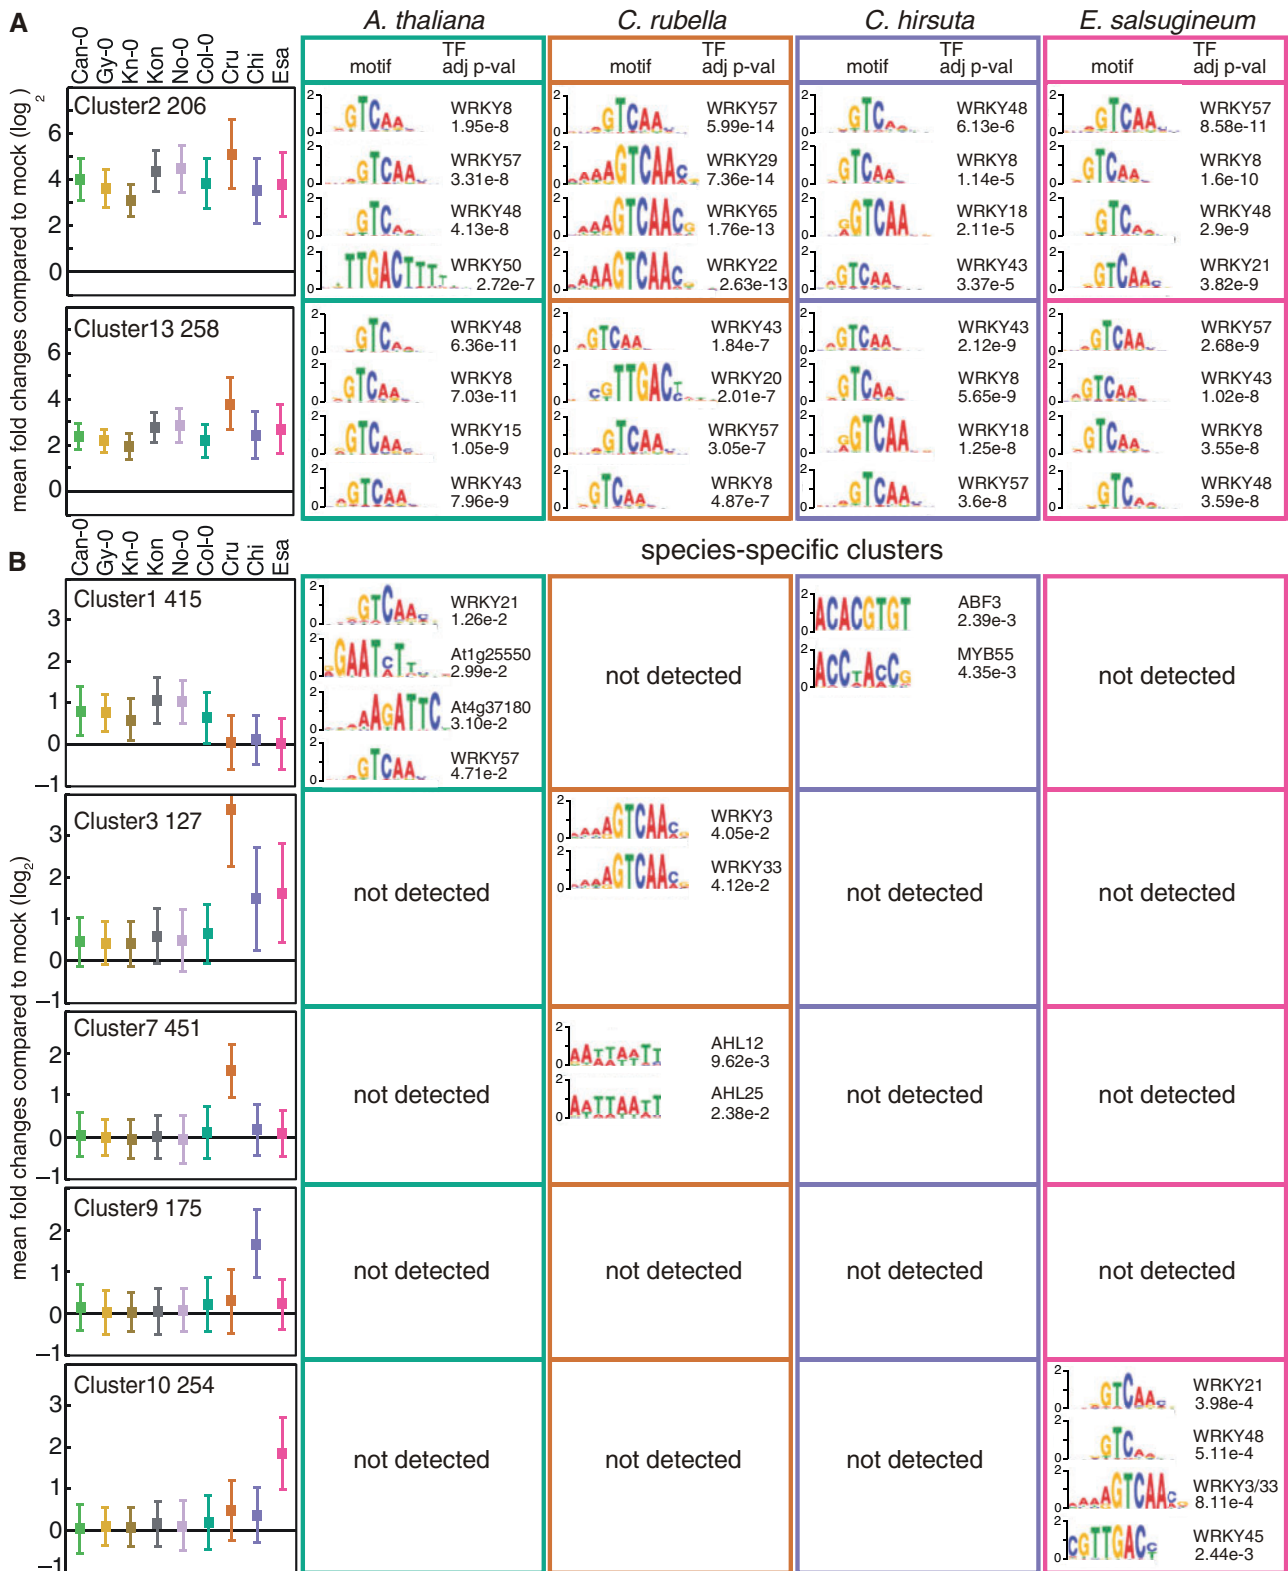

**Figure 7** Enrichment of known TF-binding motifs in the 5'-regulatory regions of genes in shared and species-specific clusters. The 500 bp upstream sequences of the transcription start sites of the genes in the individual clusters were tested for enrichment of known TF binding motifs. Names of TFs, sequence logos, and adjusted *P*-values (up to the top four) of motifs are shown for each Brassicaceae species. The names of clusters, the number of DEGs, and mean log<sub>2</sub> fold changes ±SD compared with mock are shown on the left side. See [Supplemental Data Set S7](#) for the other clusters. For the complete list of all enriched TF binding motifs, please see [Supplemental Data Set S7](#). Ath, *A. thaliana* (Col-0); Cru, *C. rubella* (N22697); Chi, *C. hirsuta* (Oxford); Esa, *E. salsugineum* (Shandong).

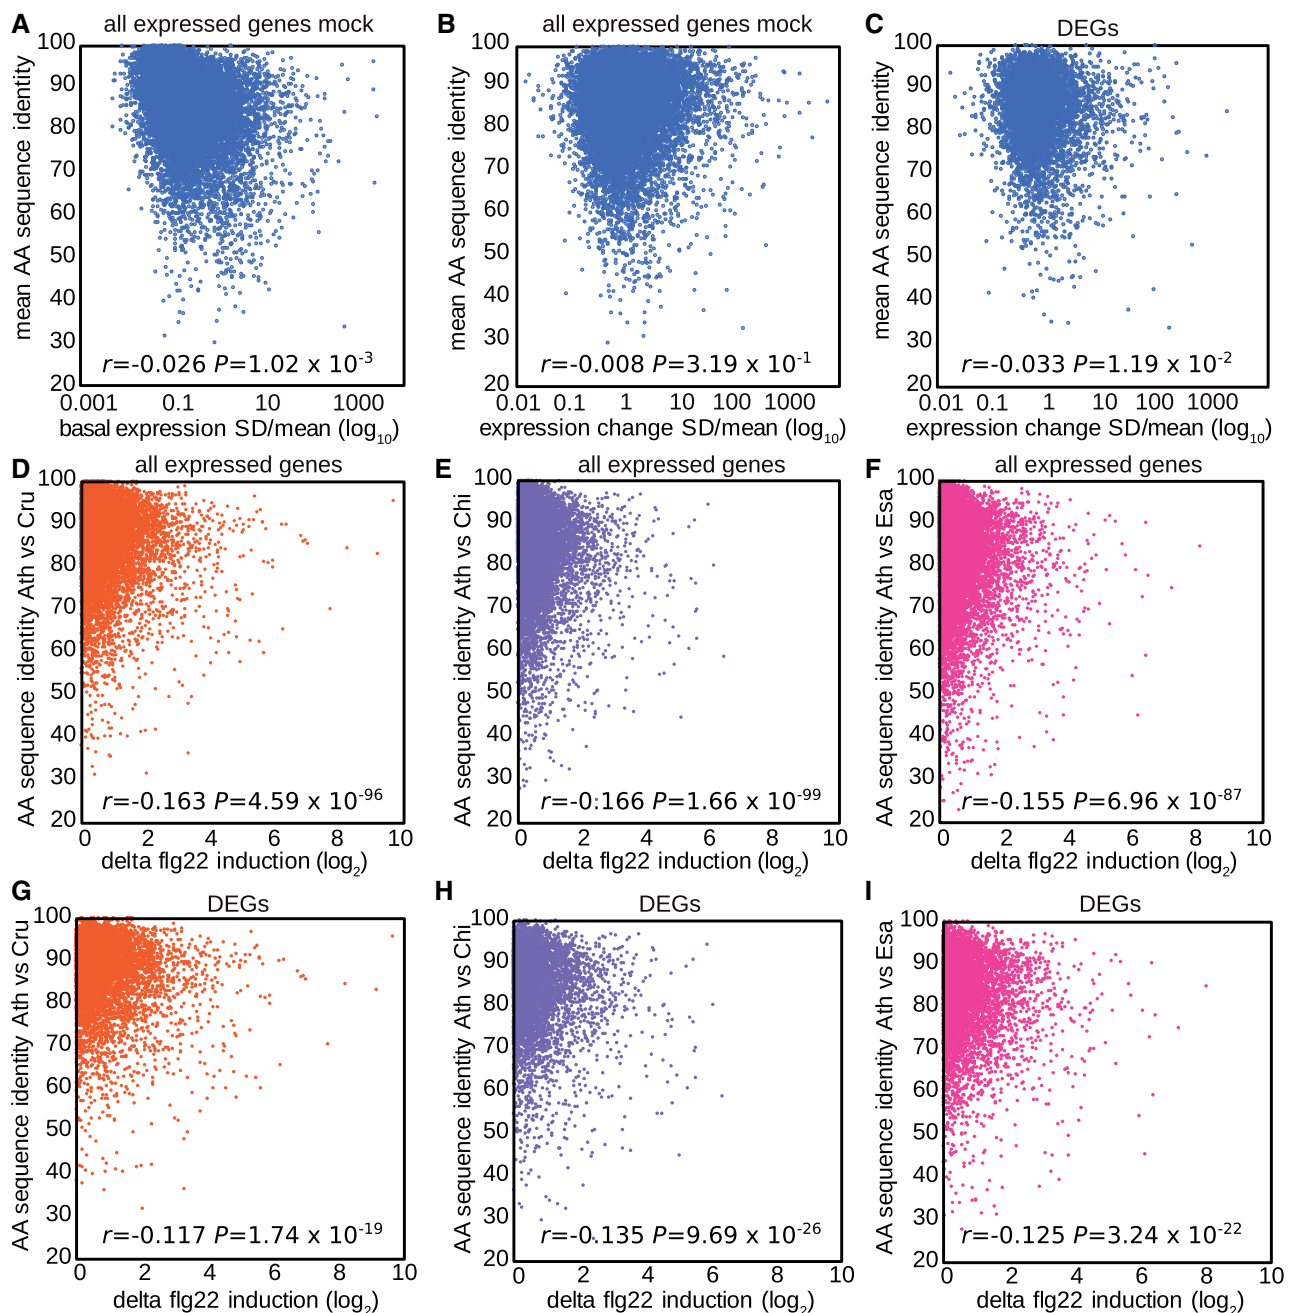

**Figure 8** Gene expression variation does not correlate with coding sequence variation. A, Mean AA sequence identities of *C. rubella*, *C. hirsuta*, and *E. salsugineum* to *A. thaliana* (y-axis) were plotted against the SD/mean of the expression values in mock samples of all four Brassicaceae plants for all expressed genes (x-axis). B and C, Mean AA identities of *C. rubella*, *C. hirsuta*, and *E. salsugineum* to *A. thaliana* were plotted against the SD/mean of flg22-induced expression changes in all four Brassicaceae plants for all expressed genes with 1:1 orthologs (16,100 genes) (B) or 5,961 DEGs (C). D–I, Pairwise AA sequence identities of *C. rubella* (D, G), *C. hirsuta* (E, H) and *E. salsugineum* (F, I) to *A. thaliana* were plotted against the flg22-induced expression changes between the compared species for all expressed genes (D–F) or DEGs (G–I).

regardless of species-specificity (Supplemental Figure S10). However, Cluster 5 (highly induced in all species) showed the lowest genetic divergence in its upstream regions (the first 100 bp upstream of the gene), while the neutral synonymous variation for the same cluster was the highest (Supplemental Figure S10). This suggests that this lower divergence at upstream regions is not the result of lower mutation rates but rather the result of stronger purifying

selection acting on the regulatory regions of those genes with conserved expression patterns in this cluster.

### Differences in metabolome profiles in response to flg22 among the Brassicaceae species

Some genes showing species-specific expression patterns were associated with GO terms connected to secondary metabolism (Supplemental Data Set S8). This prompted us to

investigate whether flg22 treatment differentially affects the metabolite profiles of Brassicaceae plants. In unbiased HPLC–MS analysis, we detected various differentially accumulating metabolites (DAMs;  $q$ -value  $< 0.05$ , minimum fold change of 1.5) in response to flg22 among the four Brassicaceae plants (Figure 9, A). Interestingly, most flg22-induced changes in metabolite accumulation were species-specific, and only 19 out of 360 DAM signals were commonly affected by flg22 in all tested Brassicaceae species, indicating a strong diversification of the native metabolome and its reprogramming in response to flg22 (Figure 9, B). This notion was further supported by the clustering of  $\log_2$  fold changes for all DAMs, which showed only a limited number of overlaps between metabolome alterations, as well as by principal component analysis (Figure 9, C and D).

## Discussion

Our comparison of transcriptome responses within *A. thaliana* accessions and among four Brassicaceae species revealed

fundamental features of transcriptome evolution: we identified conserved core genes and species-specific responsive genes across Brassicaceae plants during flg22-induced PTI. A core set of responsive genes conserved across Brassicaceae likely reflect important gene regulatory processes in PTI, whereas each species evolved its specific responses for species-specific arms. Our unified experimental setup for all transcriptome comparisons has allowed us to detect gene expression variation among these species.

We have shown that transcriptome responses to flg22 are remarkably conserved within *A. thaliana*. A previous study found that variation in the expression of stress-responsive genes accounted for the majority of divergence in expression among *A. thaliana* accessions (Kawakatsu et al., 2016), and many studies have described the strong plasticity of immune-responsive gene expression in the face of other environmental perturbations such as abiotic stress (Singh et al., 2014; Ueno et al., 2015; Coolen et al., 2016; Berens et al., 2019). Since the *A. thaliana* accessions that we examined were collected from habitats with distinct climatic

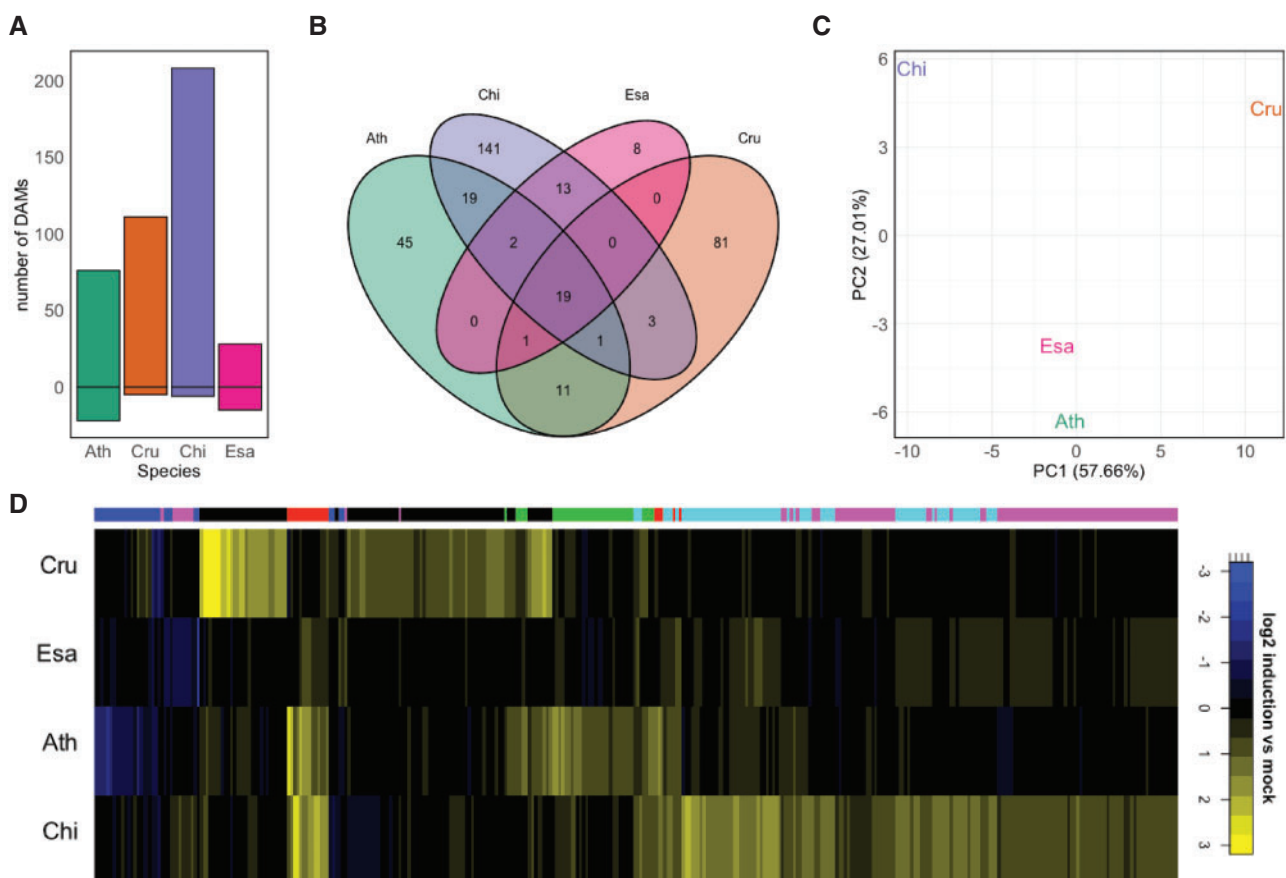

**Figure 9** Flg22 triggers unique metabolomic changes in the Brassicaceae species examined. Metabolite profiles were analyzed by HPLC–MS 24 h after mock or flg22 treatment in 12-day-old Brassicaceae seedlings. A, DAMs were determined using the following criteria: treatment effect or interaction treatment  $\times$  species was significant with  $q$ -value  $< 0.05$ ,  $|\log_2$  fold change|  $> 0.585$  and significance of the difference between treatment and control with  $P < 0.05$ . The bars represent the number of up- or down-regulated DAMs in each species. Ath, *A. thaliana* (Col-0); Cru, *C. rubella* (N22697); Chi, *C. hirsuta* (Oxford); Esa, *E. salsugineum* (Shandong). B, A Venn diagram showing the number of shared and unique DAMs between species. All DAMs present in at least one species were used. C, Principal component analysis of DAMs in at least one species. D, Heatmap of  $\log_2$  fold changes for DAMs in at least one species clustered by  $k$ -means clustering ( $k = 6$ ; clusters marked in the color bar on top of the heatmap).

conditions (such as the Canary Islands and Lithuania) and have diverse genetic backgrounds, these highly conserved early transcriptome responses to flg22 were surprising. This finding indicates that short-term evolution in divergent environments did not introduce major variation in early transcriptional responses during PTI.

We found that the expression changes of large numbers of genes are conserved among different Brassicaceae species during flg22-induced PTI. Many of these genes have not been previously characterized or linked to plant defense. Thus, our dataset provides the basis and rationale for future studies. In addition, the conservation of transcriptome responses to flg22 over 26 million years of Brassicaceae evolution suggests the functional importance of these as-yet-uncharacterized genes. Many studies have demonstrated the importance of TFs that regulate the expression of specific genes during PTI (Birkenbihl et al., 2017; Jacob et al., 2018). However, the lack of a method to efficiently and specifically block transcriptional reprogramming during PTI means that it remains obscure whether genome-wide transcriptional reprogramming during PTI is required for plant defense against pathogens and/or for adaptation to their environments. The evolutionary constraint feature in the transcriptome responses strongly suggests that the massive transcriptional reprogramming during PTI is advantageous for Brassicaceae plants in nature.

While all tested Brassicaceae species deployed rapid, massive transcriptional reprogramming as well as MAPK activation, they exhibited different PTI outputs. For instance, in *C. hirsuta* and *E. salsugineum*, the flg22-elicited transcriptional response was not associated with flg22-induced resistance against *Pto* DC3000. This seems counterintuitive for species not benefitting from costly transcriptional reprogramming. Maintaining transcriptional reprogramming during PTI is analogous to the retention of susceptible alleles for *Rps2*, a resistance gene for the pathogen virulence effector AvrRpt2 (MacQueen et al., 2016). One possible explanation is that susceptible *Rps2* alleles encode recognition specificities for pathogen effectors that have yet to be identified (MacQueen et al., 2016). Similarly, transcriptional reprogramming induced by flg22 may be associated with effective resistance against different bacterial pathogens or the control of plant microbiota in *C. hirsuta* and *E. salsugineum* (Hacquard et al., 2017; Chen et al., 2020). Understanding how diversity in PTI responses across plant species is linked to plant adaptation would be crucial for comprehending the role of PTI.

In addition to conserved transcriptome responses, each of the tested Brassicaceae species exhibited species/lineage-specific expression signatures during flg22-induced PTI. We have shown that species-specific expression patterns are conserved among multiple accessions or sister species in the respective species. Moreover, variation in transcriptome responses during flg22-induced PTI was incongruent with the Brassicaceae phylogeny, which is inconsistent with the notion that variation was caused solely by genetic drift. Thus, some of the species-specific expression signatures observed in this study during flg22-induced PTI may be selectively driven expression shifts.

We have also shown that interspecific differences are larger than intraspecific variations in the early transcriptome response during PTI. This expression divergence could be explained by variation in the expression and function of TFs and/or variation in cis-regulatory elements in 5'-gene regulatory regions that coincide in a lineage-specific manner. It has been thought that most intraspecific variations could be attributed to cis-associated differences that are tightly constrained by linkage disequilibrium, while interspecific differences largely occur because trans-associated alterations are a larger mutational target (Signor and Nuzhdin, 2018). However, disentangling the contributions of trans- and cis-components of transcriptional control remains challenging. A recent study revealed that transcriptome variation is disposed to strong selection pressure in perturbed environments, in particular, genes with expression stochasticity and plasticity (Groen et al., 2020). In line with the important role of WRKY TFs in gene induction during immunity (Tsuda and Somssich, 2015; Birkenbihl et al., 2017), we have revealed that WRKY-TF binding motifs are highly enriched in the 5'-gene regulatory sequences of species in which the genes are induced. This suggests that some specific gains of TF-binding motifs in the 5'-gene regulatory regions account for the evolution of some species-specific flg22-responsive expression changes. It is also possible that duplicated genes could be responsible for species-specific differences that we may have missed in this study, as we entirely omitted lineage-specific duplicates. However, this would not introduce a very serious bias, as a large proportion of genes in the genomes (17,856) were successfully analyzed in this study.

Whether gene expression evolution correlates with coding sequence evolution remains a contentious topic (Tirosch and Barkai, 2008). Some studies found a positive correlation between gene expression and coding sequence evolution and argued that similar selection pressures act on both modes of evolution (Hunt et al., 2013; Whittle et al., 2014). In contrast, others have concluded that gene expression evolution may provide additional evolutionary capacity if the sequence of the respective gene is under evolutionary constraint (Shapiro et al., 2004; Harrison et al., 2012; Dean et al., 2015). In this scenario, gene expression variation would not be correlated with coding sequence evolution (Tirosch and Barkai, 2008; Renaut et al., 2012; Uebbing et al., 2016). In the current study, we found almost no correlation between variation in basal gene expression or flg22-induced gene expression changes and variation in their AA sequences and dN/dS. The connection between gene expression and coding sequence variation might depend on the species and growth conditions (Whittle et al., 2014). Further studies, especially in the plant field, are needed to better define the relationship between these two modes of evolution.

## Materials and methods

### Plant materials

Plant materials used in this study are described in Tables 1–3.



## Plant growth

Seeds were sterilized by vortexing in 70% ethanol for 5 min, followed by 6% NaClO for 10 min, washed five times with sterile water, and stratified in sterile water at 4°C for 5–7 days. Sterilized seeds were grown on half Murashige and Skoog (MS) Agar (2.45 g/L M&S + Vitamins + MES (Duchefa, Haarlem, Netherlands), 1% sucrose, 0.5% plant agar, pH 5.8) plates in a Percival plant growth chamber (CU-36LX5D, Percival, USA) at 22°C with 10 h of light (white fluorescent lamps) for 11 days if not stated otherwise. Eleven-day-old seedlings were transferred to liquid half MS Medium (2.45 g/L M&S + Vitamins + MES (Duchefa), 1% sucrose) 1 day before flg22 treatment. Alternatively, 12-day-old seedlings were transferred to soil (Stender, Schermbeck, Germany) and grown at 23°C/20°C under a 10/14 h (light/dark) cycle and 60% relative humidity. Soil-grown plants were transferred to another chamber at 22°C with a 12 h photoperiod and 60% relative humidity 3 days before bacterial inoculation.

**Table 1** Brassicaceae species and accessions used in this study

| Species                      | Accession       | Abbreviation | Reference               |
|------------------------------|-----------------|--------------|-------------------------|
| <b><i>A. thaliana</i></b>    | <b>Col-0</b>    | Ath          | Kenichi Tsuda lab       |
| <b><i>C. rubella</i></b>     | <b>N22697</b>   | Cru          | Slotte et al. (2013)    |
| <i>C. grandiflora</i>        | Unknown         | Cgr          | Slotte et al. (2013)    |
| <b><i>C. hirsuta</i></b>     | <b>Oxford</b>   | Chi          | Hay and Tsiantis (2006) |
| <i>C. hirsuta</i>            | Wa              | Wa           | Cartolano et al. (2015) |
| <i>C. hirsuta</i>            | GR2             | GR2          | Miltos Tsiantis lab     |
| <b><i>E. salsugineum</i></b> | <b>Shandong</b> | Esa          | Miltos Tsiantis lab     |
| <i>E. salsugineum</i>        | Yukon           | YT           | Miltos Tsiantis lab     |

Bold entries indicate species used for RNA-seq and metabolome analyses.

**Table 2** *A. thaliana* accessions used in this study

| Accession      | Cs Number      | Country | Admixture Group <sup>a</sup> | Reference                      |
|----------------|----------------|---------|------------------------------|--------------------------------|
| An-1           | CS76435        | BEL     | Admixed                      | 1001 Genomes Consortium (2016) |
| Bla-1          | CS76451        | ESP     | Spain                        | 1001 Genomes Consortium (2016) |
| <b>Can-0</b>   | <b>CS76740</b> | ESP     | Relict                       | 1001 Genomes Consortium (2016) |
| <b>Col-0</b>   | <b>CS76778</b> | USA     | Germany                      | 1001 Genomes Consortium (2016) |
| CVI-0          | CS76789        | CPV     | Relict                       | 1001 Genomes Consortium (2016) |
| Edi-0          | CS76831        | UK      | Admixed                      | 1001 Genomes Consortium (2016) |
| <b>Gy-0</b>    | <b>CS78901</b> | FRA     | Western Europe               | 1001 Genomes Consortium (2016) |
| HR10           | CS76940        | UK      | Western_Europe               | 1001 Genomes Consortium (2016) |
| Kas-2          | CS78905        | IND     | Asia                         | 1001 Genomes Consortium (2016) |
| <b>Kn-0</b>    | <b>CS76969</b> | LTU     | Central_Europe               | 1001 Genomes Consortium (2016) |
| <b>Kondara</b> | <b>CS76532</b> | TJK     | Asia                         | 1001 Genomes Consortium (2016) |
| Ms-0           | CS76555        | RUS     | Asia                         | 1001 Genomes Consortium (2016) |
| <b>No-0</b>    | <b>CS77128</b> | GER     | Central_Europe               | 1001 Genomes Consortium (2016) |
| Pna-17         | CS76575        | USA     | Germany                      | 1001 Genomes Consortium (2016) |
| Rsch4          | CS77222        | RUS     | Germany                      | 1001 Genomes Consortium (2016) |
| Se-0           | CS76597        | ESP     | Spain                        | 1001 Genomes Consortium (2016) |
| Sf-2           | CS77247        | ESP     | Spain                        | 1001 Genomes Consortium (2016) |
| Sorbo          | CS78917        | TJK     | Asia                         | 1001 Genomes Consortium (2016) |
| Tamm-27        | CS77341        | FIN     | North_Sweden                 | 1001 Genomes Consortium (2016) |
| Ts-1           | CS76615        | ESP     | Spain                        | 1001 Genomes Consortium (2016) |
| Tsu-0          | CS77389        | JPN     | Admixed                      | 1001 Genomes Consortium (2016) |
| Van-0          | CS76623        | CAN     | Western_Europe               | 1001 Genomes Consortium (2016) |
| Wil-2          | CS78856        | LTU     | Central_Europe               | 1001 Genomes Consortium (2016) |
| Wu-0           | CS78858        | GER     | Germany                      | 1001 Genomes Consortium (2016) |

Bold entries indicate accessions used for RNA-seq. <sup>a</sup>Admixture group (1001 Genomes Consortium, 2016).

## Flg22 treatment

Eleven-day-old seedlings were transferred from half MS Agar to 24-well plates, each containing 1.6 mL of half MS Medium, for 24 h prior to treatment. If not otherwise stated, 5–10 seedlings per sample were transferred to each well. For the flg22 treatment, 800 µL of 3 µM flg22 (EZBiolab Inc., Carmel, IN, USA) solution was added to the medium containing the seedlings, resulting in a final concentration of 1 µM flg22. Seedlings were harvested in liquid nitrogen at the indicated time points, and three wells were combined into one biological sample. The samples were stored at –80°C until use.

## Seedling growth inhibition assay

Seven-day-old seedlings grown on half MS Agar were transferred to 1.6 mL of half MS Medium with or without 1 µM flg22 and grown for another 12 days under these conditions. The fresh weight of 12 pooled seedlings was then measured. The experiment was carried out three independent times, and statistical analysis was performed with log<sub>2</sub>-transformed fresh weight values.

## Bacterial growth assay

To prepare bacterial inoculum, *P. syringae* pv. *tomato* DC3000 (*Pto* DC3000) or the T3SS deficient *Pto* DC3000 mutant *Pto* *hrcC* (Tsuda et al., 2008) was grown on NYGA agar (2% glycerol, 0.5% Bacto Peptone, 0.3% yeast extract, and 1% Bacto Agar, pH 7.0) plates containing 25 µg/mL rifampicin for 3 days at 28°C. The bacterial strains were transferred to liquid NYGA medium containing 25 µg/mL rifampicin and incubated overnight at 28°C with shaking at 200 rpm to a final OD<sub>600</sub> between 0.8 and 1. The bacteria were pelleted by

**Table 3** *A. thaliana* mutants used in this study

| Species            | Mutant allele            | Locus     | Source               |
|--------------------|--------------------------|-----------|----------------------|
| <i>A. thaliana</i> | <i>sid2-2</i>            | AT1G74710 | Tsuda et al. (2008)  |
| <i>A. thaliana</i> | <i>fls2</i> (SAIL_691C4) | AT5G46330 | Zipfel et al. (2004) |

centrifugation at 5,000 rpm and washed twice with sterile 5 mM MgSO<sub>4</sub> before dilution to an OD<sub>600</sub> of 0.0002 (*Pto* DC3000) or 0.001 (*Pto* *hrcC*).

Four to five-week-old plants were used. Two leaves per plant were infiltrated with 1 μM flg22 or sterile water (mock) using a needleless syringe. One day later, leaves treated with flg22 or mock solution were infiltrated in the early afternoon with the bacterial suspension. Two days after bacterial infiltration, two leaf disks (0.565 cm<sup>2</sup>) per sample from two leaves were crushed in 400 μL sterile MgSO<sub>4</sub> using a Retsch mixer mill. Dilution series were made and streaked on NYGA agar plates containing 25 μg/mL rifampicin. The plates were incubated for 2 days at 28°C before colony forming units were counted.

Alternatively, bacterial growth was quantified using a qPCR-based method as previously described (Ross and Somssich, 2016). In brief, DNA was extracted from bacteria-infiltrated leaves using a FastDNA Spin Kit (MP Biomedicals, Santa Ana, CA, USA). Extracted DNA was quantified and adjusted to 8.75 μg/μL to achieve a final concentration of 35 μg DNA in a qPCR. Bacterial DNA was quantified using the expression levels of the *Pto* DC3000-specific *oprF* gene relative to plant *ACTIN2* (*ACT2*) DNA. ΔCt values were calculated by subtracting the Ct value of the target gene from that of *ACT2*. These ΔCt values were considered to be log<sub>2</sub> values and used for statistical analysis. The primers used are listed in Supplemental Data Set S9.

### MAPK phosphorylation assay

The MAPK phosphorylation assay was performed as previously described (Tsuda et al., 2009). In short, 12-day-old seedlings were treated with 1 μM flg22 or mock for 15 min, frozen in liquid nitrogen, and ground with four metal beads in a Retsch MM 400 mixing mill (Retsch, Haan, Germany). Then, 150 μL of MAPK extraction buffer (50 mM Tris-HCl [pH 7.5], 5 mM EDTA, 5 mM EGTA, 2 mM DTT, 10 mM NaF, 50 mM β-glycerolphosphate, 10% glycerol, complete proteinase inhibitor and PhosSTOP phosphatase inhibitor [both from Roche, Germany]) was added to the sample, and protein was extracted by centrifugation (4°C, 12,000 rpm). Protein concentration was determined using a Coomassie Protein Assay Kit (Thermo Fisher Scientific, Waltham, MA, USA), and 25 μg of protein was separated by SDS-PAGE for 1 h at 100 V. MAPK phosphorylation was detected via immunoblotting using an antiphospho-p44/42 MAPK antibody (dilution 1:5,000 in TBST; Cell Signaling Technology, Danvers, MA, USA) as primary and HRP-conjugated anti-rabbit IgG (1:10,000 in TBST; Sigma-Aldrich, St. Louis, MO, USA) as secondary antibody. Luminescence was detected using SuperSignal West Femto Chemiluminescent Reagent

(Thermo Fisher Scientific) and a ChemiDoc MP imaging system (Bio-Rad, Hercules, CA, USA).

### RNA extraction, cDNA synthesis, and RT-qPCR

Seedling samples were ground in 2-mL reaction tubes with four metal beads using a Retsch MM 400 mixing mill (Retsch). RNA was extracted using peqGOLD TriFast with an additional DNA digestion step using DNase I (Roche). The RNA was precipitated overnight at 4°C in 100% ethanol containing 115 mM Na-Ac (pH 5.2; Sigma-Aldrich, Munich, Germany) to further clean up and increase RNA yield. RNA quality and quantity were determined using a NanoDrop spectrophotometer (Thermo Fisher Scientific). Subsequently, cDNA was synthesized from 4 μg DNase-treated total RNA using Superscript II or IV Reverse Transcriptase (Thermo Fisher Scientific) according to the manufacturer's instructions. qPCR was performed on a CFX Connect Real-Time PCR Detection System (Bio-Rad) using EvaGreen (Biotium, Fremont, CA, USA). The target gene was quantified relative to the expression of *ACT2* from *A. thaliana* or other Brassicaceae plants. ΔCt values were calculated by subtracting the Ct value of the target gene from that of *ACT2*. These ΔCt values were considered to be log<sub>2</sub> values and were further used for statistical analysis. Primers used are listed in Supplemental Data Set S9.

### Statistical analysis

Statistical analysis for the seedling growth inhibition assay, bacterial growth assay, and RT-qPCR was performed using a mixed linear model with the function lmer implemented in the lme4 package within the R environment. To meet the assumptions of the mixed linear model, we log-transformed the raw data, when needed. The following model was fit to the data: measurement<sub>gyr</sub> ~ GY<sub>gy</sub> + R<sub>r</sub> + ε<sub>gyr</sub>, with GY denoting the genotype:treatment interaction effect; R the biological replicate effect; and ε the residual. The *P*-values calculated in two-tailed *t* tests were corrected for multiple hypothesis testing using the *q*-value package when samples were compared with each other in a given figure panel.

### RNA-seq

RNA-seq experiments were independently performed three times. In each experiment, mock and flg22 treatments were conducted side by side. These three biological replicates were used for RNA-seq experiments. RNA quality was checked with the Agilent 2100 Bioanalyzer or Caliper LabChip GX device. PolyA enrichment and library preparation were performed with a NEBNext Ultra Directional RNA Library Prep Kit for Illumina (New England Biolabs, Ipswich, MA, USA). Libraries were quantified by fluorometry, immobilized, and processed onto a flow cell with a cBot (Illumina, San Diego, CA, USA), and subjected to sequencing-by-synthesis with HiSeq version 3 chemistry. Library construction and RNA sequencing were performed by the Max Planck-Genome-center Cologne (<http://mpgc.mpi-pz.mpg.de/home/>) with a single 100 bp (*A. thaliana* Col-0, *C. rubella*, C.

*hirsuta*, and *E. salsugineum*) or 150 bp reads (all other *A. thaliana* accessions) using the Illumina HiSeq2500 or HiSeq3000 platform, respectively. After quality control, sequencing reads were mapped to respective reference genomes (Table 4) using TopHat2 (version 2.1.1) with default parameters, except for the parameters described in Table 5. The resulting bam files were used to count the number of reads per gene using HtSeq (version 0.6.0) software with default parameters. To exclude biases caused by mapping sequence reads of different *A. thaliana* accessions to the Col-0 genome, we created mapping genome files for each *A. thaliana* accession by correcting the Col-0 reference genome with SNP data available for these accessions. We downloaded the variants table for each accession from the website of the 1001 Genomes Project (intersection\_snp\_short\_indel\_vcf version 3.1 dataset). The pseudo-genome sequence of each accession was inferred by replacing the reference allele with the corresponding alternative allele using the pseudogeno function implemented in GEAN software. We created general feature format files by projecting the coordinates of the TAIR10 gene annotations onto the coordinates of each accession with the gffCoordinateLiftOver function of GEAN (Song et al., 2019). With these files, we performed a second mapping as described above.

The read counts determined by HTSeq were analyzed in the R environment (version 3.3.1) using the edgeR (version 3.14.0) and limma (version 3.28.14) packages. Genes expressed at low levels were excluded from analysis by filtering out genes with a mean read count <10 counts per sample. Read counts then were normalized using TMM normalization embedded in the edge R package, and the data were log<sub>2</sub>-transformed using the voom function within the limma package to yield log<sub>2</sub> counts per million. For individual analysis of Brassicaceae species and *A. thaliana* accession data, a linear model was fit to each gene using the lmFit function of limma with the following equation:  $S_{gyr} = GY_{gy} + R_r + \varepsilon_{gy}$ , where  $S$  denotes log<sub>2</sub> expression value,  $GY$  represents the genotype:treatment interaction and random factors,  $R$  indicates biological replicate, and  $\varepsilon$  represents residual. For the combined analysis of Brassicaceae species and *A. thaliana* accession data, the replicate effect was removed from the linear model, resulting in the following terms:  $S_{gy} = GY_{gy} + \varepsilon_{gy}$ , where  $S$  denotes log<sub>2</sub> expression value,  $GY$  represents genotype:treatment interaction, and  $\varepsilon$  represents residual. For variance shrinkage of calculated  $P$ -values, the eBayes function of limma was used. The resulting  $P$ -values were corrected for multiple

testing by calculating the false discovery rate (FDR; or  $q$ -value) using the  $q$ -value (version 2.4.2) package.

Normalization and determination of DEGs were performed separately for each Brassicaceae species and each *A. thaliana* accession. To compare expression changes mediated by flg22 between Brassicaceae plants, we used Best Reciprocal BLAST to identify genes that show a 1:1 ortholog with a corresponding *A. thaliana* gene and only kept the genes with 1:1 orthologs in every Brassicaceae species. Genes with a one-directional best hit relationship were not included in these analyses. This resulted in a set of 17,856 1:1 ortholog genes. We restricted the analysis of *A. thaliana* accessions to the same set of 17,856 genes to enable a direct comparison of results obtained from Brassicaceae and *A. thaliana* accession analysis. To directly compare Brassicaceae plants with *A. thaliana* accessions, we further normalized and determined DEGs for all 1-h samples together using the set of 17,856 orthologous genes. This approach enabled us to compare basal expression levels between Brassicaceae and *A. thaliana* accessions.

The R packages and software used for further analysis of the sequencing data are listed in Table 6. Heatmaps and  $k$ -mean clustering of DEGs were generated using the Genesis software with default parameters.

The expression clusters of DEGs determined for the combined RNA-seq analysis of *A. thaliana* accessions together with Brassicaceae species were investigated for enrichment of GO terms corresponding to biological processes using the BinGO plugin within the Cytoscape environment. GO term enrichment was calculated using a hypergeometric test, followed by Benjamini and Hochberg FDR correction

**Table 5** TopHat2 parameters used for mapping RNA-seq reads

| TopHat2 parameter      | Value          |
|------------------------|----------------|
| --read mismatches      | 10             |
| --read-gap-length      | 10             |
| --read-edit-dist       | 20             |
| --min-anchor-length    | 5              |
| --splice-mismatches    | 2              |
| --min-intron-length    | 30             |
| --max-intron-length    | 1,000          |
| --max-insertion-length | 20             |
| --max-deletion-length  | 20             |
| --max-multihits        | 10             |
| --segment-mismatches   | 3              |
| --min-coverage-intron  | 30             |
| --max-coverage-intron  | 10,000         |
| --library-type         | fr-firststrand |
| --b2                   | Very sensitive |

**Table 4** Reference genomes used for RNA-seq analysis

| Species               | Reference genome     | Publication           | Source                   |
|-----------------------|----------------------|-----------------------|--------------------------|
| <i>A. thaliana</i>    | TAIR 10              | Lamesch et al. (2012) | Phytozome 10             |
| <i>Ath</i> accessions | SNP corrected TAIR10 |                       | This study               |
| <i>C. rubella</i>     | Version 1.0          | Slotte et al. (2013)  | Phytozome 10             |
| <i>C. hirsute</i>     | Version 1.0          | Gan et al. (2016)     | http://chi.mpipz.mpg.de/ |
| <i>E. salsugineum</i> | Version 1.0          | Yang et al. (2013)    | Phytozome 10             |

**Table 6** Software and packages used in this study

| Software/package | Version | Citation                 | Use                         |
|------------------|---------|--------------------------|-----------------------------|
| AME              | 4.12.0  | McLeay and Bailey (2010) | TF motif enrichment         |
| BinGO            | 3.0.3   | Maere et al. (2005)      | GO enrichment               |
| Clustal Omega    | 1.2.4   | Sievers et al. (2011)    | Multiple sequence alignment |
| Cytoscape        | 3.3.0   | Shannon et al. (2003)    | Run BinGO                   |
| EdgeR            | 3.14.0  | Robinson et al. (2010)   | Analysing DEGs              |
| Genevestigator   |         | Hruz et al. (2008)       | Public transcriptome data   |
| Genesis          | 1.7.7   | Sturm et al. (2002)      | Heatmaps, clustering        |
| Htseq            | 0.6.0   | Anders et al. (2015)     | Count RNA-seq reads         |
| limma            | 3.28.14 | Ritchie et al. (2015)    | Analyzing DEGs              |
| MixOmics         | 6.0     | Rohart et al. (2017)     | PCA                         |
| TopHat           | 2.1.1   | Trapnell et al. (2009)   | Map RNA-seq reads           |
| VennDiagram      | 1.6.17  | Chen and Boutros (2011)  | Venn diagrams               |

implemented in the BinGO plugin. The whole genome annotation was used as a background.

Known TF motifs enriched in individual expression clusters of DEGs determined in the combined RNA-seq analysis of *A. thaliana* accessions together with Brassicaceae species were identified using the AME tool within the MEME suite. For this purpose, 5'-gene regulatory regions (500 bp upstream of the transcription start site) were extracted for each tested Brassicaceae species. Enrichment of TF motifs was determined in each of the 15 *k*-means clusters for all tested Brassicaceae species using the 5'-regulatory regions of all expressed genes with clear 1:1 orthologs (16,100 genes) as a background. Known TF motifs were retrieved from the JASPAR CORE (2018) plants database that is implemented in AME.

To compare AA sequence conservation with expression variation, all AA sequences of expressed genes with 1:1 orthologs in all species were extracted for each Brassicaceae species. The sequences were aligned using Clustal Omega and percent identity matrices were extracted. The AA sequence identity output of Clustal Omega was used to calculate the mean AA identity across *C. rubella*, *C. hirsuta*, and *E. salsugineum* compared with *A. thaliana* as a proxy of sequence conservation. The mean AA sequence identities were subsequently plotted against the SD/mean of *flg22*-expression changes across all four Brassicaceae species, which served as a proxy for expression variation among the tested Brassicaceae species. Similarly, the mean AA sequence identity was also plotted against the SD/mean of the normalized expression value in control samples. In addition, pairwise AA sequence identities between *A. thaliana* and each Brassicaceae species were plotted against the absolute difference in *flg22*-induced expression changes between the compared species. This analysis was performed for all expressed genes or only for DEGs.

To calculate the dN, dS, and dN/dS ratios for DEGs, we aligned the AA sequences of each of orthogroup using MUSCLE with a maximum-likelihood approach (Edgar, 2004) and translated this alignment into the corresponding codon alignment with PAL2NAL (Suyama et al., 2006), also removing stop codons and gaps. The resulting codon alignments were used for pairwise dN, dS, and dN/dS rate calculations

using the codeml tool from PAML (Yang, 2007). Software and packages used in this study are described in Table 6.

### Phylogenetic analysis

Various dates have been reported for the divergence of Brassicaceae species (Franzke et al., 2016). For instance, Beilstein et al. (2010) dated the Brassicaceae crown node age to 54 Mya, whereas more recent publications dated this event 31–37 Mya (Edger et al., 2015; Hohmann et al., 2015; Franzke et al., 2016; Huang et al., 2016). Therefore, in this study, we used TIMETREE (www.timetree.org), which synthesizes divergence times based on the available literature to estimate the timescale of Brassicaceae species evolution (Hedges et al., 2015). Phylogenetic trees were retrieved from timetree.org based on divergence time estimates from 15 studies (Koch et al., 2000; Heenan et al., 2002; Parkinson et al., 2005; Franzke et al., 2009; Yue et al., 2009; Beilstein et al., 2010; Couvreur et al., 2010; Mandáková et al., 2010; Arakaki et al., 2011; Hermant et al., 2012; Naumann et al., 2013; Artyukova et al., 2014; Vanneste et al., 2014; Hohmann et al., 2015; Huang et al., 2016).

### Genevestigator analysis

The following datasets were used for Genevestigator analysis: AT-00106 (*Pto* DC3000); AT-00110 (ABA or MeJA); AT-00113 (SA); AT-00147 (*B. cinerea*); AT-00253 (*flg22* or OG); AT-00493 (hypoxia); AT-00553 (*Hyaloperonospora arabidopsidis*); AT-00560 (drought); AT-00597 (Pep2 and elf18); AT-00645 (heat stress).

### SA analysis

SA levels were analyzed as described previously with an ultra-high performance liquid chromatography/Q-Exactive system (Thermo Fisher Scientific) using an ODS column (AQUITY UPLC BEH C18, 1.7  $\mu$ m, 2.1  $\times$  100 mm; Waters, Milford, MA, USA) (Kojima et al., 2009; Kojima and Sakakibara, 2012; Yasuda et al., 2016).

### Secondary metabolite extraction, acquisition, and processing of data

Control and *flg22*-treated seedlings were collected and extracted as described before (Bednarek et al., 2011). The

extracts were subjected to LC–MS analyses performed using the Acquity UPLC system (Waters) attached to a micrOTof-Q mass spectrometer (Bruker Daltonics, Hamburg, Germany). Chromatographic separations were carried out on a BEH C18 column (2.1 × 150 mm, 1.7 μm particle size) at 22°C with a mobile phase flow rate of 0.35 mL/min. The elution was conducted using water containing 0.1% formic acid (Sigma–Aldrich, Munich, Germany) (Solvent A) and acetonitrile (VWR Chemicals, Fontenay-sous-Bois, France) containing 1.9% of water and 0.1% of formic acid (Solvent B) in the following gradient: 0–10 min from 0% to 25% B, 10–15 min to 30% B, 20–24 min maintained at 100% B, and up to 24.5 min the system was returned to starting conditions and re-equilibrated for 8 min. The spectrometer was calibrated with sodium formate salt clusters prior to each analysis. MS was operated using the following settings: ion source voltage of –4.5 or 4.5 kV, nebulization of nitrogen at a pressure of 1.2 bar and a gas flow rate of 8 L/min. Ion source temperature was 220°C. The spectra were scanned in positive and negative ion mode at a range of 50–1000 *m/z* at a resolution > 15,000 FWHM (full width at half maximum). Data acquisition was supervised by HyStar version 3.2 software (Bruker Daltonics).

The LC–MS data were converted to *mzXML* format by MSConvert version: 3.0.11781 tool available in Proteowizard software prior to further processing by MZmine version 2.31 software (Pluskal et al., 2010). Data from each experiment were processed separately for negative and positive ionization. In first step, lists of masses were generated by the mass detector module in each scan in the raw data files. Chromatograms for each mass detected continuously over the scans were then built using a chromatogram builder algorithm. These chromatograms were deconvoluted by the deconvolution module using the wavelets algorithm based on Bioconductor's XCMS package for R (Tautenhahn et al., 2008). An isotopic peaks grouper was used for isotope elimination followed by adduct and complex searching. Deviation of retention times between peak lists was reduced by a retention time normalizer. Such transformed peaks were aligned in all samples through a match score by a join aligner module. The resulting peaks list was completed by supplemental peak detection with a peak finder algorithm prior to missing value imputation (gap filling). The generated data table was subsequently exported in *csv* format for further statistical analysis.

Observations equal to zero (below the detection level) were substituted by half of the minimum non-zero observation for each metabolite. The observations were then transformed by  $\log_2(10^3 \times)$ . Two-way analysis of variance (ANOVA) was done with experiment as a block (random effects) and treatment, species as two fixed factors; analysis was done together for positive and negative ionization. A species was determined to be a DAM if it met all three conditions: (1) treatment effect or interaction treatment × species was significant with *q*-value < 0.05 (FDR, Benjamini and Hochberg, 1995), (2) individual tests for each species  $P < 0.05$  (significant test for the difference between

treatment and control was done for each species), and (3)  $|\text{fold change}| > 1.5$ , where fold change is flg22 treatment/control. Statistical analysis was performed in Genstat version 19. Visualizations including barplot, PCA, heatmap, and Venn diagram were created in R.

### Intra specific variation

Analyses of intra specific variation in *A. thaliana* were conducted using a subset of the accessions from the 1001 Genome Project (1001 Genomes Consortium, 2016). To minimize the potentially confounding effects of demography and admixture, we only selected accessions from the non-relict Iberian ancestry group with < 5% admixture from other groups (<http://1001genomes.github.io/admixture-map/>), which led to a sample of 45 accessions. Genomic regions for genes and upstream regions were identified using the REST API of the Ensembl database (<https://rest.ensembl.org/>). For each gene, the longest available transcript was used. Genetic divergence between *A. thaliana* and *A. lyrata* was calculated using the genome-wide pairwise alignment available on Ensembl Plant (LastZ) and also accessed through their REST API server. The code used for interacting with the REST APIs and calculating summary statistics of polymorphism and divergence data is written in R for this study and is made publicly available here: [https://gitlab.mpcdf.mpg.de/slaurent/mk\\_dfe.git](https://gitlab.mpcdf.mpg.de/slaurent/mk_dfe.git).

To determine whether mean genetic divergence between *A. thaliana* and *A. lyrata* was significant (Supplemental Figure S10) across clusters, we performed a one-way ANOVA with gene expression clustering as the grouping factor. We used the *anova\_test* function from the *rstatix* package; the R code implementing this function is publicly available in the following repository: [https://gitlab.mpcdf.mpg.de/slaurent/mk\\_dfe.git](https://gitlab.mpcdf.mpg.de/slaurent/mk_dfe.git) in the folder *anova\_figureS9*.

### Hierarchical clustering

RNA-seq mapped read counts of 1:1 orthologs were subjected to TMM normalization after removing low-expression orthologs (average count of < 10 reads). A pairwise distance matrix ( $1 - \text{Pearson's correlation coefficient}$ ) was obtained from  $\log_2$  fold changes of CPM values. A dendrogram was generated with the R package “pvclust” with default settings. The same analysis was performed using  $\log_2$  fold changes of DAMs for metabolomic comparison.

### OU modeling

OU modeling was performed using the R package “l1ou” (Khabbazian et al., 2016) with the following parameters: *max.nShifts* = 1, *criterion* = pBIC, *root.model* = OUFixedRoot, *rescale* = FALSE, and *alpha.upper* = 0.053. The upper limit of  $\alpha$  estimates was calculated by the *find\_grid\_alpha* function in the R package “PhylogeneticEM” (Bastide et al., 2018).

### Accession numbers

The RNA-seq data used in this study were deposited in the National Center for Biotechnology Information Gene Expression Omnibus database (accession no. GSE115991).

## Supplemental data

The following materials are available in the online version of this article.

**Supplemental Figure S1** Effects of flg22 on *Pto hrcC* growth in Brassicaceae species.

**Supplemental Figure S2** Overlap of DEGs at each time point.

**Supplemental Figure S3** *SID2*-dependent SA accumulation is not required for sustained transcriptome responses in *A. thaliana*.

**Supplemental Figure S4** Heatmap for all DEGs in Brassicaceae species after flg22 treatment.

**Supplemental Figure S5** Comparison of two different mapping approaches for *A. thaliana* accession RNA-seq reads.

**Supplemental Figure S6** Gene family size and basal gene expression levels do not explain species-specific expression signatures.

**Supplemental Figure S7** Multi-optima phylogenetic OU modeling of log<sub>2</sub> fold changes of 1:1 orthologs in Figure 5, A.

**Supplemental Figure S8** Enrichment of TF-motifs within the 5'-regulatory regions of DEG clusters.

**Supplemental Figure S9** Gene expression variation does not correlate with dN/dS variation.

**Supplemental Figure S10** Genetic divergence between *A. thaliana* and *A. lyrata* for upstream, synonymous, and non-synonymous sites.

**Supplemental Data Set S1.** RNA-seq read counts for 1:1 orthologs in all the samples used in this study.

**Supplemental Data Set S2.** Expression changes (log<sub>2</sub>) of DEGs in Figure 3, A.

**Supplemental Data Set S3.** Expression changes (log<sub>2</sub>) of DEGs in Figure 3, C.

**Supplemental Data Set S4.** GO analysis of DEGs in Figure 3, D.

**Supplemental Data Set S5.** Expression changes (log<sub>2</sub>) of DEGs in Figure 4, G.

**Supplemental Data Set S6.** Expression changes (log<sub>2</sub>) of DEGs in Figure 5, A.

**Supplemental Data Set S7.** Enrichment analysis of known TF-binding motifs in the 5'-regulatory regions of genes in shared and species-specific clusters.

**Supplemental Data Set S8.** GO analysis of gene clusters in Figure 5, A.

**Supplemental Data Set S9.** Primers used in this study.

## Acknowledgments

The authors thank Mikiko Kojima (RIKEN CSRS) for hormone analysis, the Max-Planck Genome Centre for sequencing support, and Neysan Donnelly and Tsuda lab members for critical comments on the manuscript.

## Funding

This work was supported by the Fundamental Research Funds for the Central Universities (Program No. 2662020ZKPY009) (to K.T.), the Huazhong Agricultural

University Scientific & Technological Self-innovation Foundation (to K.T.), the Max Planck Society, a German Research Foundation grant (DECryPT/SPP2125) (to K.T.), IMPRS Cologne (T.M.W.), National Science Center OPUS (UMO-2015/17/B/NZ1/00871) (to P.B.), and PRELUDIUM (UMO-2013/09/N/NZ2/02080) (to K.K.) grants.

*Conflict of interest statement.* None declared.

## References

- Albert I, Hua C, Nürnberger T, Pruitt RN, Zhang L (2020) Surface sensor systems in plant immunity. *Plant Physiol* **182**: 1582–1596
- Anders S, Pyl PT, Huber W (2015) HTSeq—a python framework to work with high-throughput sequencing data. *Bioinformatics* **31**: 166–169
- Arakaki M, Christin PA, Nyffeler R, Lendel A, Eggli U, Ogburn RM, Spriggs E, Moore MJ, Edwards EJ (2011) Contemporaneous and recent radiations of the world's major succulent plant lineages. *Proc Natl Acad Sci U S A* **108**: 8379–8384
- Artyukova EV, Kozyrenko MM, Boltenkov EV, Gorovoy PG (2014) One or three species in *Megadenia* (Brassicaceae): insight from molecular studies. *Genetica* **142**: 337–350
- Asai T, Tena G, Plotnikova J, Willmann MR, Chiu WL, Gomez-Gomez L, Boller T, Ausubel FM, Sheen J (2002) MAP kinase signalling cascade in *Arabidopsis* innate immunity. *Nature* **415**: 977–983
- Bastide P, Ané C, Robin S, Mariadassou M (2018) Inference of adaptive shifts for multivariate correlated traits. *Syst Biol* **67**: 662–680
- Baxter L, Jironkin A, Hickman R, Moore J, Barrington C, Krusche P, Dyer NP, Buchanan-Wollaston V, Tiskin A, Beynon J, et al. (2012) Conserved noncoding sequences highlight shared components of regulatory networks in dicotyledonous plants. *Plant Cell* **24**: 3949–3965
- Bednarek P, Piślewska-Bednarek M, Ver Loren van Themaat E, Maddula RK, Svatoš A, Schulze-Lefert P (2011) Conservation and clade-specific diversification of pathogen-inducible tryptophan and indole glucosinolate metabolism in *Arabidopsis thaliana* relatives. *New Phytol* **192**: 713–726
- Beilstein MA, Nagalingum NS, Clements MD, Manchester SR, Mathews S (2010) Dated molecular phylogenies indicate a Miocene origin for *Arabidopsis thaliana*. *Proc Natl Acad Sci U S A* **107**: 18724–18728
- Benjamini Y, Hochberg Y (1995) Controlling the false discovery rate: a practical and powerful approach to multiple testing. *J R Stat Soc B (Methodol)* **57**: 289–300
- Berens ML, Wolinska KW, Spaepen S, Ziegler J, Nobori T, Nair A, Krüler V, Winkelmüller TM, Wang Y, Mine A, et al. (2019) Balancing trade-offs between biotic and abiotic stress responses through leaf age-dependent variation in stress hormone cross-talk. *Proc Natl Acad Sci U S A* **116**: 2364–2373
- Birkenbihl RP, Kracher B, Roccaro M, Somssich IE (2017) Induced genome-wide binding of three *Arabidopsis* WRKY transcription factors during early MAMP-triggered immunity. *Plant Cell* **29**: 20–38
- Boutrot F, Zipfel C (2017) Function, discovery, and exploitation of plant pattern recognition receptors for broad-spectrum disease resistance. *Annu Rev Phytopathol* **55**: 257–286
- Broadley MR, White PJ, Hammond JP, Graham NS, Bowen HC, Emmerson ZF, Fray RG, Iannetta PPM, McNicol JW, May ST (2008) Evidence of neutral transcriptome evolution in plants. *New Phytol* **180**: 587–593
- Cardoso-Moreira M, Halbert J, Valloton D, Velten B, Chen C, Shao Y, Liechti A, Ascensão K, Rummel C, Ovchinnikova S,

- et al. (2019) Gene expression across mammalian organ development. *Nature* **571**: 505–509
- Cartolano M, Pieper B, Lempe J, Tattersall A, Huijser P, Tresch A, Darrah PR, Hay A, Tsiantis M** (2015) Heterochrony underpins natural variation in *Cardamine hirsuta* leaf form. *Proc Natl Acad Sci U S A* **112**: 10539–10544
- Chen H, Boutros PC** (2011) Venn diagram: a package for the generation of highly-customizable Venn and Euler diagrams in R. *BMC Bioinformatics* **12**: 35
- Chen T, Nomura K, Wang X, Sohrabi R, Xu J, Yao L, Paasch BC, Ma L, Kremer J, Cheng Y, et al.** (2020) A plant genetic network for preventing dysbiosis in the phyllosphere. *Nature* **580**: 653–657
- Coolen S, Proietti S, Hickman R, Davila Olivas NH, Huang PP, Van Verk MC, Van Pelt JA, Wittenberg AHJ, De Vos M, Prins M, et al.** (2016) Transcriptome dynamics of *Arabidopsis* during sequential biotic and abiotic stresses. *Plant J* **86**: 249–267
- Couvreur TLP, Franzke A, Al-Shehbaz IA, Bakker FT, Koch MA, Mummenhoff K** (2010) Molecular phylogenetics, temporal diversification, and principles of evolution in the mustard family (Brassicaceae). *Mol Biol Evol* **27**: 55–71
- Das Gupta M, Tsiantis M** (2018) Gene networks and the evolution of plant morphology. *Curr Opin Plant Biol* **45**: 82–87
- Dean R, Harrison PW, Wright AE, Zimmer F, Mank JE** (2015) Positive selection underlies faster-Z evolution of gene expression in birds. *Mol Biol Evol* **32**: 2646–2656
- Dunning FM, Sun W, Jansen KL, Helft L, Bent AF** (2007) Identification and mutational analysis of *Arabidopsis* FLS2 leucine-rich repeat domain residues that contribute to flagellin perception. *Plant Cell* **19**: 3297–3313
- Edgar RC** (2004) MUSCLE: multiple sequence alignment with high accuracy and high throughput. *Nucleic Acids Res* **32**: 1792–1797
- Edger PP, Heide-Fischer H, Bekaert M, Rota J, Glöckner G, Platts AE, Heckel DG, Her JP, Wafula EK, Tang M, et al.** (2015) The butterfly plant arms-race escalated by gene and genome duplications. *Proc Natl Acad Sci U S A* **112**: 8362–8366
- Fitzpatrick CR, Salas-González I, Conway JM, Finkel OM, Gilbert S, Russ D, Teixeira PJL, Dangel JL** (2020) The plant microbiome: from ecology to reductionism and beyond. *Annu Rev Microbiol* **74**: annurev-micro-022620-014327
- Franzke A, German D, Al-Shehbaz IA, Mummenhoff K** (2009) *Arabidopsis* family ties: molecular phylogeny and age estimates in Brassicaceae. *Taxon* **58**: 425–437
- Franzke A, Koch MA, Mummenhoff K** (2016) Turnip time travels: age estimates in brassicaceae. *Trends Plant Sci* **21**: 554–561
- Gan X, Hay A, Kwantes M, Haberger G, Hallab A, Ioio RD, Hofhuis H, Pieper B, Cartolano M, Neumann U, et al.** (2016) The *Cardamine hirsuta* genome offers insight into the evolution of morphological diversity. *Nat Plants* **2**: 16167
- Gómez-Gómez L, Felix G, Boller T** (1999) A single locus determines sensitivity to bacterial flagellin in *Arabidopsis thaliana*: sensitivity of *A. thaliana* to bacterial flagellin. *Plant J* **18**: 277–284
- Groen SC, Calic I, Joly-Lopez Z, Platts AE, Choi JY, Natividad M, Dorph K, Mauck WM, Bracken B, Cabral CAU, et al.** (2020) The strength and pattern of natural selection on gene expression in rice. *Nature* **578**: 572–576
- Hacquard S, Spaepen S, Garrido-Oter R, Schulze-Lefert P** (2017) Interplay between innate immunity and the plant microbiota. *Annu Rev Phytopathol* **55**: 565–589
- Hansen TF** (1997) Stabilizing selection and the comparative analysis of adaptation. *Evolution* **51**: 1341–1351
- Harrison PW, Wright AE, Mank JE** (2012) The evolution of gene expression and the transcriptome–phenotype relationship. *Semin Cell Dev Biol* **23**: 222–229
- Hay A, Tsiantis M** (2006) The genetic basis for differences in leaf form between *Arabidopsis thaliana* and its wild relative *Cardamine hirsuta*. *Nat Genet* **38**: 942–947
- Hedges SB, Marin J, Suleski M, Paymer M, Kumar S** (2015) Tree of life reveals clock-like speciation and diversification. *Mol Biol Evol* **32**: 835–845
- Heenan PB, Mitchell AD, Koch M** (2002) Molecular systematics of the New Zealand *Pachycladon* (Brassicaceae) complex: generic circumscription and relationships to *Arabidopsis* sens. lat. and *Arabis* sens. lat. *New Zealand J Bot* **40**: 543–562
- Hermant M, Hennion F, Bartish IV, Yguel B, Prinzing A** (2012) Disparate relatives: life histories vary more in genera occupying intermediate environments. *Perspect Plant Ecol Evol Syst* **14**: 283–301
- Hillmer RA, Tsuda K, Rallapalli G, Asai S, Truman W, Papke MD, Sakakibara H, Jones JDG, Myers CL, Katagiri F** (2017) The highly buffered *Arabidopsis* immune signaling network conceals the functions of its components. *PLoS Genet* **13**: e1006639
- Hodgins KA, Yeaman S, Nurkowski KA, Rieseberg LH, Aitken SN** (2016) Expression divergence is correlated with sequence evolution but not positive selection in conifers. *Mol Biol Evol* **33**: 1502–1516
- Hohmann N, Wolf EM, Lysak MA, Koch MA** (2015) A time-calibrated road map of Brassicaceae species radiation and evolutionary history. *Plant Cell* **27**: 2770–2784
- Hruz T, Laule O, Szabo G, Wessendorp F, Bleuler S, Oertle L, Widmayer P, Gruissem W, Zimmermann P** (2008) Genevestigator v3: a reference expression database for the meta-analysis of transcriptomes. *Adv Bioinformatics* **2008**: 420747
- Huang CH, Sun R, Hu Y, Zeng L, Zhang N, Cai L, Zhang Q, Koch MA, Edger I, Al-Shehbaz PP, et al.** (2016) Resolution of brassicaceae phylogeny using nuclear genes uncovers nested radiations and supports convergent morphological evolution. *Mol Biol Evol* **33**: 394–412
- Hunt BG, Ometto L, Keller L, Goodisman MAD** (2013) Evolution at two levels in fire ants: the relationship between patterns of gene expression and protein sequence evolution. *Mol Biol Evol* **30**: 263–271
- Jacob F, Kracher B, Mine A, Seyffert C, Blanvillain-Baufumé S, Parker JE, Tsuda K, Schulze-Lefert P, Maekawa T** (2018) A dominant-interfering *camta3* mutation compromises primary transcriptional outputs mediated by both cell surface and intracellular immune receptors in *Arabidopsis thaliana*. *New Phytol* **217**: 1667–1680
- Kawakatsu T, Carol Huang SS, Jupe F, Sasaki E, Schmitz RJ, Urlich MA, Castanon R, Nery JR, Barragan C, He Y, et al.** (2016) Epigenomic diversity in a global collection of *Arabidopsis thaliana* accessions. *Cell* **166**: 492–505
- Khabbazian M, Kriebel R, Rohe K, Ané C** (2016) Fast and accurate detection of evolutionary shifts in Ornstein–Uhlenbeck models. *Methods Ecol Evol* **7**: 811–824
- Khaitovich P, Hellmann I, Enard W, Nowick K, Leinweber M, Franz H, Weiss G, Lachmann M, Pääbo S** (2005) Parallel patterns of evolution in the genomes and transcriptomes of humans and chimpanzees. *Science* **309**: 1850–1854
- Koch MA, Haubold B, Mitchell-Olds T** (2000) Comparative evolutionary analysis of chalcone synthase and alcohol dehydrogenase loci in *Arabidopsis*, *Arabis*, and related genera (Brassicaceae). *Mol Biol Evol* **17**: 1483–1498
- Koenig, D Jiménez-Gómez JM, Kimura S, Fulop D, Chitwood DH, Headland LR, Kumar R, Covington MF, Devisetty UK, Tat AV, et al.** (2013) Comparative transcriptomics reveals patterns of selection in domesticated and wild tomato. *Proc Natl Acad Sci U S A* **110**: E2655–E2662
- Kojima M, Kamada-Nobusada T, Komatsu H, Takei K, Kuroha T, Mizutani M, Ashikari M, Ueguchi-Tanaka M, Matsuoka M, Suzuki K, et al.** (2009) Highly sensitive and high-throughput analysis of plant hormones using MS-probe modification and liquid chromatography–tandem mass spectrometry: an application for hormone profiling in *Oryza sativa*. *Plant Cell Physiol* **50**: 1201–1214

- Kojima M, Sakakibara H** (2012) Highly sensitive high-throughput profiling of six phytohormones using MS-probe modification and liquid chromatography-tandem mass spectrometry. *Methods Mol Biol* **918**: 151–164
- Lamesch P, Berardini TZ, Donghui Li, Swarbreck D, Wilks C, Sasidharan R, Muller R, Dreher K, Alexander DL, Garcia-Hernandez M, et al.** (2012) The Arabidopsis Information Resource (TAIR): improved gene annotation and new tools. *Nucleic Acids Res* **40**: D1202–D1210
- Lou Y, Xu XF, Zhu J, Gu JN, Blackmore S, Yang ZN** (2014) The tapetal AHL family protein TEK determines nexine formation in the pollen wall. *Nat Commun* **5**: 3855
- Lu X, Tintor N, Mentzel T, Kombrink E, Boller T, Robatzek S, Schulze-Lefert P, Saijo Y** (2009) Uncoupling of sustained MAMP receptor signaling from early outputs in an Arabidopsis endoplasmic reticulum glucosidase II allele. *Proc Natl Acad Sci U S A* **106**: 22522–22527
- MacQueen A, Sun X, Bergelson J** (2016) Genetic architecture and pleiotropy shape costs of Rps2-mediated resistance in *Arabidopsis thaliana*. *Nat Plants* **2**: 16110
- Maere S, Heymans K, Kuiper M** (2005) BiNGO: a Cytoscape plugin to assess overrepresentation of gene ontology categories in biological networks. *Bioinformatics* **21**: 3448–3449
- Mandáková T, Joly S, Krzywinski M, Mummenhoff K, Lysak MA** (2010) Fast diploidization in close mesopolyploid relatives of Arabidopsis. *Plant Cell* **22**: 2277–2290
- McLeay RC, Bailey TL** (2010) Motif enrichment analysis: a unified framework and an evaluation on ChIP data. *BMC Bioinformatics* **11**: 165
- Mine A, Seyfferth C, Kracher B, Berens ML, Becker D, Tsuda K** (2018) The defense phytohormone signaling network enables rapid, high-amplitude transcriptional reprogramming during effector-triggered immunity. *Plant Cell* **30**: 1199–1219
- Naumann J, Salomo K, Der JP, Wafula EK, Bolin JF, Maass E, Frenzke L, Samain MS, Neinhuis C, dePamphilis CW, et al.** (2013) Single-copy nuclear genes place haustorial Hydnoraceae within piperales and reveal a cretaceous origin of multiple parasitic angiosperm lineages. *PLoS ONE* **8**: e79204
- Neculea A, Kaessmann H** (2014) Evolutionary dynamics of coding and non-coding transcriptomes. *Nat Rev Genet* **15**: 734–748
- Nielsen R** (2005) Molecular signatures of natural selection. *Annu Rev Genet* **39**: 197–218
- One Thousand Plant Transcriptomes Initiative. (2019) One thousand plant transcriptomes and the phylogenomics of green plants. *Nature* **574**: 679–685
- Parkinson CL, Mower JP, Qiu YL, Shirk AJ, Song K, Young ND, DePamphilis CW, Palmer JD** (2005) Multiple major increases and decreases in mitochondrial substitution rates in the plant family Geraniaceae. *BMC Evol Biol* **5**: 73
- Pluskal T, Castillo S, Villar-Briones A, Oresic M** (2010) MZmine 2: modular framework for processing, visualizing, and analyzing mass spectrometry-based molecular profile data. *BMC Bioinformatics* **11**: 395
- Renaut S, Maillet N, Normandeau E, Sauvage C, Derome N, Rogers SM, Bernatchez L** (2012) Genome-wide patterns of divergence during speciation: the lake whitefish case study. *Philos Trans R Soc B Biol Sci* **367**: 354–363
- Ritchie ME, Phipson B, Wu D, Hu Y, Law CW, Shi W, Smyth GK** (2015) limma powers differential expression analyses for RNA-sequencing and microarray studies. *Nucleic Acids Res* **43**: e47
- Robinson MD, McCarthy DJ, Smyth GK** (2010) edgeR: a Bioconductor package for differential expression analysis of digital gene expression data. *Bioinformatics* **26**: 139–140
- Rohart F, Gautier B, Singh A, Lê Cao KA** (2017) mixOmics: an R package for 'omics feature selection and multiple data integration. *PLoS Comput Biol* **13**: e1005752
- Ross A, Somssich IE** (2016) A DNA-based real-time PCR assay for robust growth quantification of the bacterial pathogen *Pseudomonas syringae* on *Arabidopsis thaliana*. *Plant Methods* **12**: 48
- Shannon P, Markiel A, Ozier O, Baliga NS, Wang JT, Ramage D, Amin N, Schwikowski B, Ideker T** (2003) Cytoscape: a software environment for integrated models of biomolecular interaction networks. *Genome Res* **13**: 2498–2504
- Shapiro MD, Marks ME, Peichel CL, Blackman BK, Nereng KS, Jönsson B, Schluter D, Kingsley DM** (2004) Genetic and developmental basis of evolutionary pelvic reduction in threespine sticklebacks. *Nature* **428**: 717–723
- Sievers F, Wilm A, Dineen D, Gibson TJ, Karplus K, Li W, Lopez R, McWilliam H, Remmert M, Söding J, et al.** (2011) Fast, scalable generation of high-quality protein multiple sequence alignments using Clustal Omega. *Mol Syst Biol* **7**: 539
- Signor SA, Nuzhdin SV** (2018) The evolution of gene expression in cis and trans. *Trends Genet* **34**: 532–544
- Singh P, Yekondi S, Chen PW, Tsai CH, Yu CW, Wu K, Zimmerli L** (2014) Environmental history modulates Arabidopsis pattern-triggered immunity in a HISTONE ACETYLTRANSFERASE1-dependent manner. *Plant Cell* **26**: 2676–2688
- Slotte T, Hazzouri KM, Ågren JA, Koenig D, Maumus F, Guo YL, Steige K, Platts AE, Escobar JS, Newman LK, et al.** (2013) The *Capsella rubella* genome and the genomic consequences of rapid mating system evolution. *Nat Genet* **45**: 831–835
- Slotte T, Bataillon T, Hansen TT, St Onge K, Wright SI, Schierup MH** (2011) Genomic determinants of protein evolution and polymorphism in Arabidopsis. *Genome Biol Evol* **3**: 1210–1219
- Song B, Sang Q, Wang H, Pei H, Gan X, Wang F** (2019) Complement genome annotation lift over using a weighted sequence alignment strategy. *Front Genet* **10**: 1046
- Sturn A, Quackenbush J, Trajanoski Z** (2002) Genesis: cluster analysis of microarray data. *Bioinformatics* **18**: 207–208
- Suyama M, Torrents D, Bork P** (2006) PAL2NAL: robust conversion of protein sequence alignments into the corresponding codon alignments. *Nucleic Acids Res* **34**: W609–612
- Tautenhahn R, Böttcher C, Neumann S** (2008) Highly sensitive feature detection for high resolution LC/MS. *BMC Bioinformatics* **9**: 504
- Tirosh I, Barkai N** (2008) Evolution of gene sequence and gene expression are not correlated in yeast. *Trends Genet* **24**: 109–113
- Trapnell C, Pachter L, Salzberg SL** (2009) TopHat: discovering splice junctions with RNA-Seq. *Bioinformatics* **25**: 1105–1111
- Tsuda K, Mine A, Bethke G, Igarashi D, Botanga CJ, Tsuda Y, Glazebrook J, Sato M, Katagiri F** (2013) Dual regulation of gene expression mediated by extended MAPK activation and salicylic acid contributes to robust innate immunity in *Arabidopsis thaliana*. *PLoS Genet* **9**: e1004015
- Tsuda K, Sato M, Glazebrook J, Cohen JD, Katagiri F** (2008) Interplay between MAMP-triggered and SA-mediated defense responses. *Plant J* **53**: 763–775
- Tsuda K, Sato M, Stoddard T, Glazebrook J, Katagiri F** (2009) Network properties of robust immunity in plants. *PLoS Genet* **5**: e1000772
- Tsuda K, Somssich IE** (2015) Transcriptional networks in plant immunity. *New Phytol* **206**: 932–947
- Uebbing S, Künstner A, Mäkinen H, Backström N, Bolivar P, Burri R, Dutoit L, Mugal CF, Nater A, Aken B, et al.** (2016) Divergence in gene expression within and between two closely related flycatcher species. *Mol Ecol* **25**: 2015–2028
- Ueno Y, Yoshida R, Kishi-Kaboshi M, Matsushita A, Jiang CJ, Goto S, Takahashi A, Hirochika H, Takatsuji H** (2015) Abiotic stresses antagonize the rice defence pathway through the tyrosine-phosphorylation of OsMPK6. *PLoS Pathogens* **11**: e1005231
- Vanneste K, Baele G, Maere S, Van de Peer Y** (2014) Analysis of 41 plant genomes supports a wave of successful genome duplications in association with the Cretaceous–Paleogene boundary. *Genome Res* **24**: 1334–1347
- Vetter MM, Kronholm I, He F, Häweker H, Reymond M, Bergelson J, Robatzek S, de Meaux J** (2012) Flagellin perception varies quantitatively in *Arabidopsis thaliana* and its relatives. *Mol Biol Evol* **29**: 1655–1667



- Vlad D, Kierzkowski D, Rast MI, Vuolo F, Ioio RD, Galinha C, Gan X, Hajheidari M, Hay A, Smith RS, et al.** (2014) Leaf shape evolution through duplication, regulatory diversification, and loss of a homeobox gene. *Science* **343**: 780–783
- Voelckel C, Gruenheit N, Lockhart P** (2017) Evolutionary transcriptomics and proteomics: insight into plant adaptation. *Trends Plant Sci* **22**: 462–471
- Whittle CA, Sun Y, Johannesson H** (2014) Dynamics of transcriptome evolution in the model eukaryote *Neurospora*. *J Evol Biol* **27**: 1125–1135
- Wu HJ, Zhang Z, Wang JY, Oh DH, Dassanayake M, Liu B, Huang Q, Sun HX, Xia R, Wu Y, et al.** (2012) Insights into salt tolerance from the genome of *Thellungiella salsuginea*. *Proc Natl Acad Sci U S A* **109**: 12219–12224
- Yang R, Jarvis DE, Chen H, Beilstein MA, Grimwood J, Jenkins J, Shu S, Prochnik S, Xin M, Ma C, et al.** (2013) The reference genome of the halophytic plant *Eutrema salsugineum*. *Front Plant Sci* **4**: 46
- Yang Z** (2007) PAML 4: phylogenetic analysis by maximum likelihood. *Mol Biol Evol* **24**: 1586–1591
- Yasuda M, Miwa H, Masuda S, Takebayashi Y, Sakakibara H, Okazaki S** (2016) Effector-triggered immunity determines host genotype-specific incompatibility in legume-rhizobium symbiosis. *Plant Cell Physiol* **57**: 1791–1800
- Yue JP, Sun H, Baum DA, Li JH, Al-Shehbaz IA, Ree R** (2009) Molecular phylogeny of *Solms-laubachia* (Brassicaceae) s.l., based on multiple nuclear and plastid DNA sequences, and its biogeographic implications. *J Syst Evol* **47**: 402–415
- Zhou JM, Zhang Y** (2020) Plant immunity: danger perception and signaling. *Cell* **181**: 978–989
- Zipfel C, Robatzek S, Navarro L, Oakeley EJ, Jones JDG, Felix G, Boller T** (2004) Bacterial disease resistance in *Arabidopsis* through flagellin perception. *Nature* **428**: 764–767
- 1001 Genomes Consortium.** (2016) 1,135 Genomes reveal the global pattern of polymorphism in *Arabidopsis thaliana*. *Cell* **166**: 481–491
